# Supplementary material for: 2,3-Di-O-picolinyl building blocks as glycosyl donors with switchable stereoselectivity
Source: Royal Society of Chemistry journal article supplement (doi:10.1039/c6ob00107f), 2016-01-01

**Supporting information**

**2,3-Di-*O*-picolinyl building blocks as glycosyl donors with switchable stereoselectivity**

Jagodige P. Yasomanee, Archana R. Parameswar, Papapida Pornsuriyasak, Nigam P. Rath, and  
Alexei V. Demchenko\*

*Department of Chemistry and Biochemistry, University of Missouri – St. Louis*  
*One University Boulevard, St. Louis, MO 63121, USA*  
*E-mail: [demchenkoa@umsl.edu](mailto:demchenkoa@umsl.edu)*

**Contents**

|                          |     |
|--------------------------|-----|
| NMR spectra              | S2  |
| X-Ray data for <b>2a</b> | S42 |

## NMR spectra

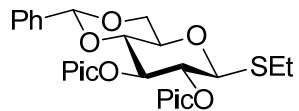

**1a**

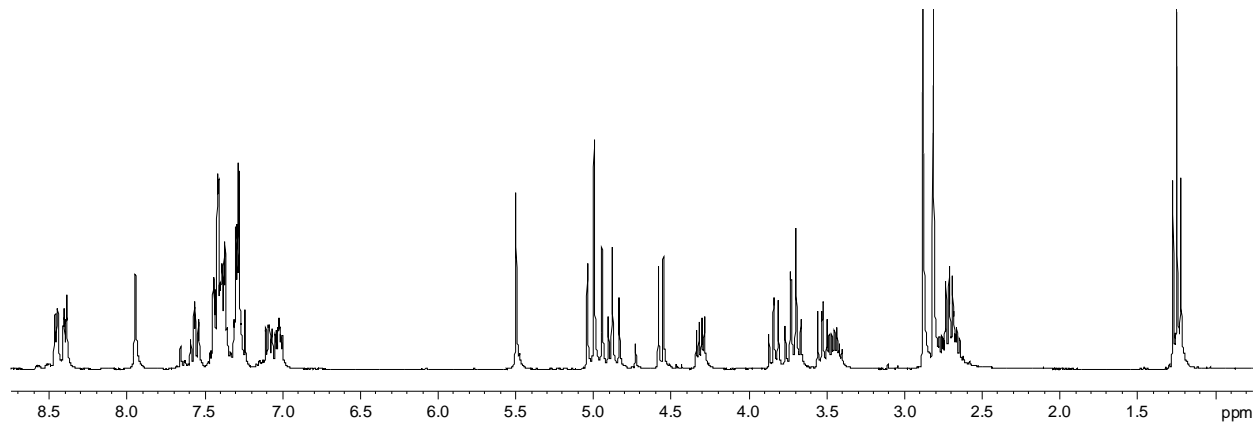

$\text{CDCl}_3$  300 MHz

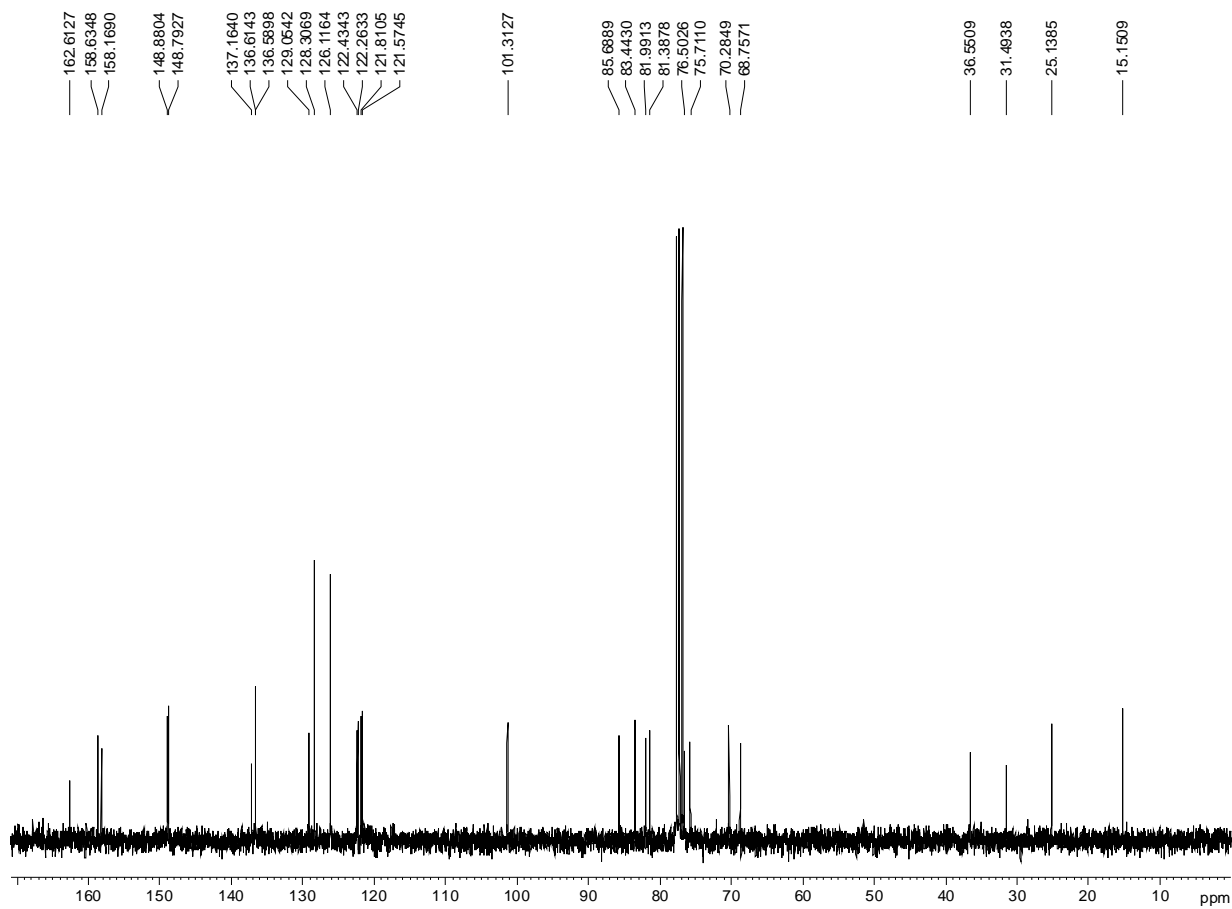

$\text{CDCl}_3$  75 MHz

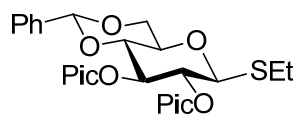

**1a**

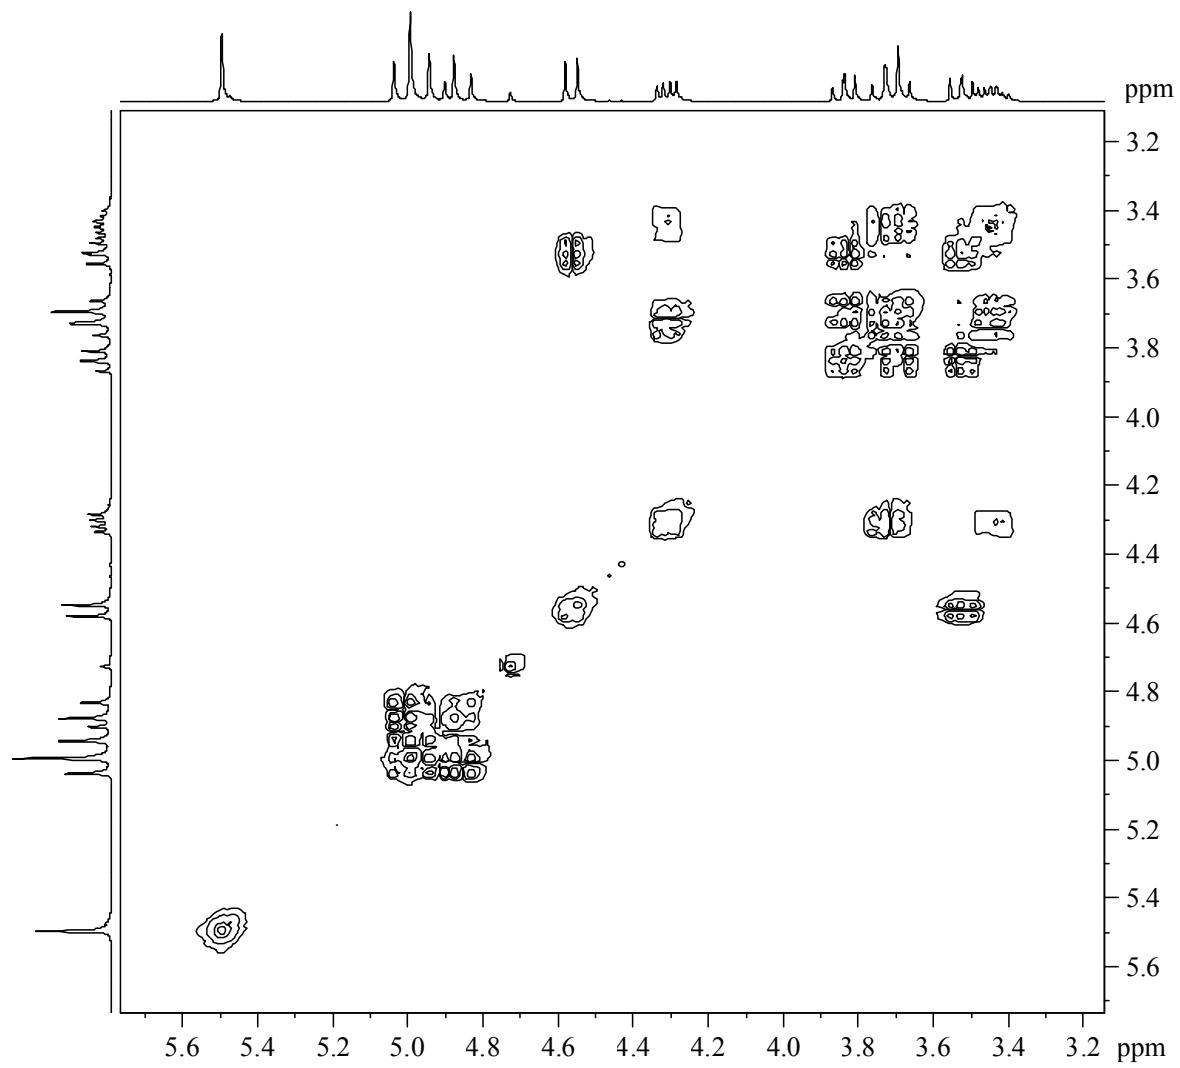

$\text{CDCl}_3$  300 MHz

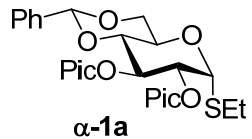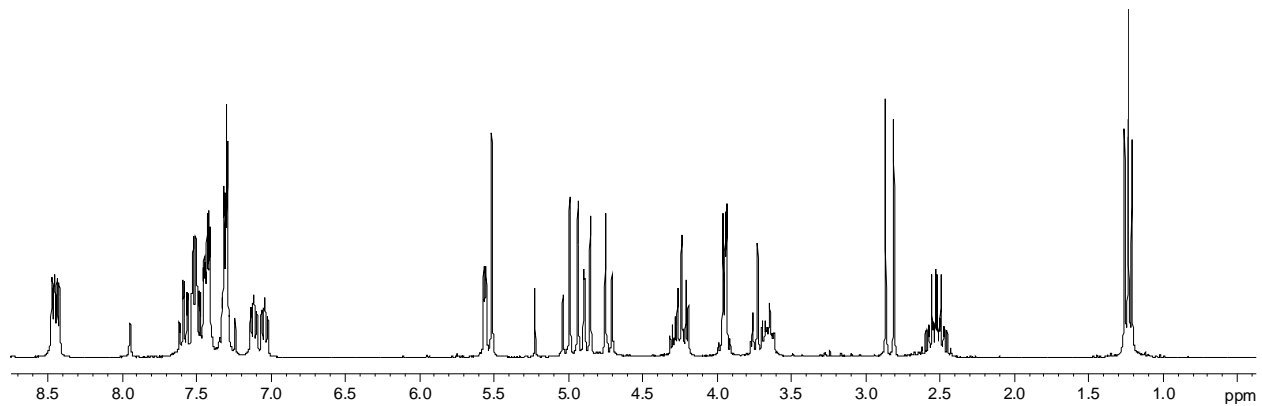

CDCl<sub>3</sub> 300 MHz

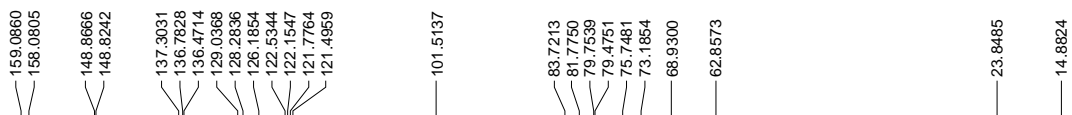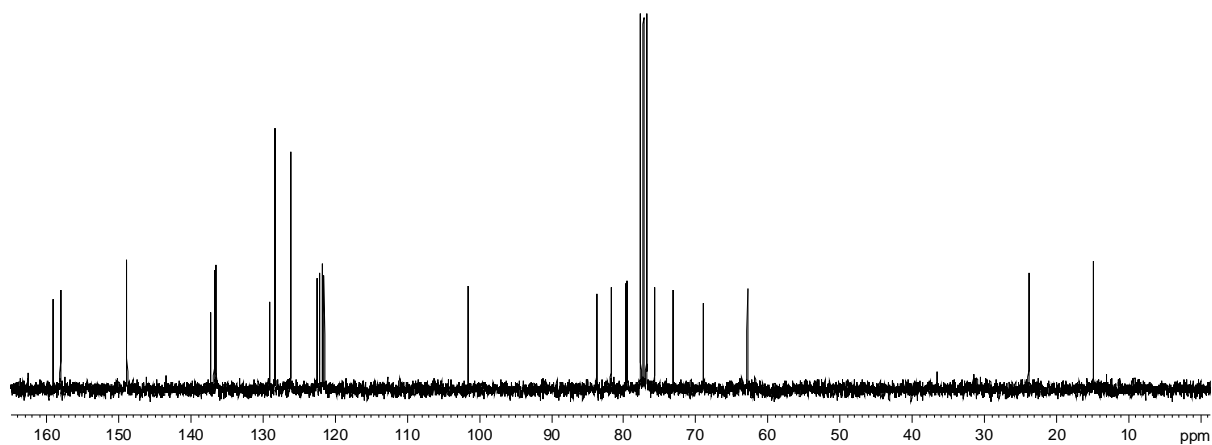

CDCl<sub>3</sub> 75 MHz

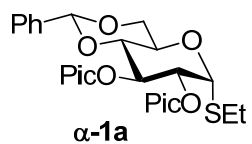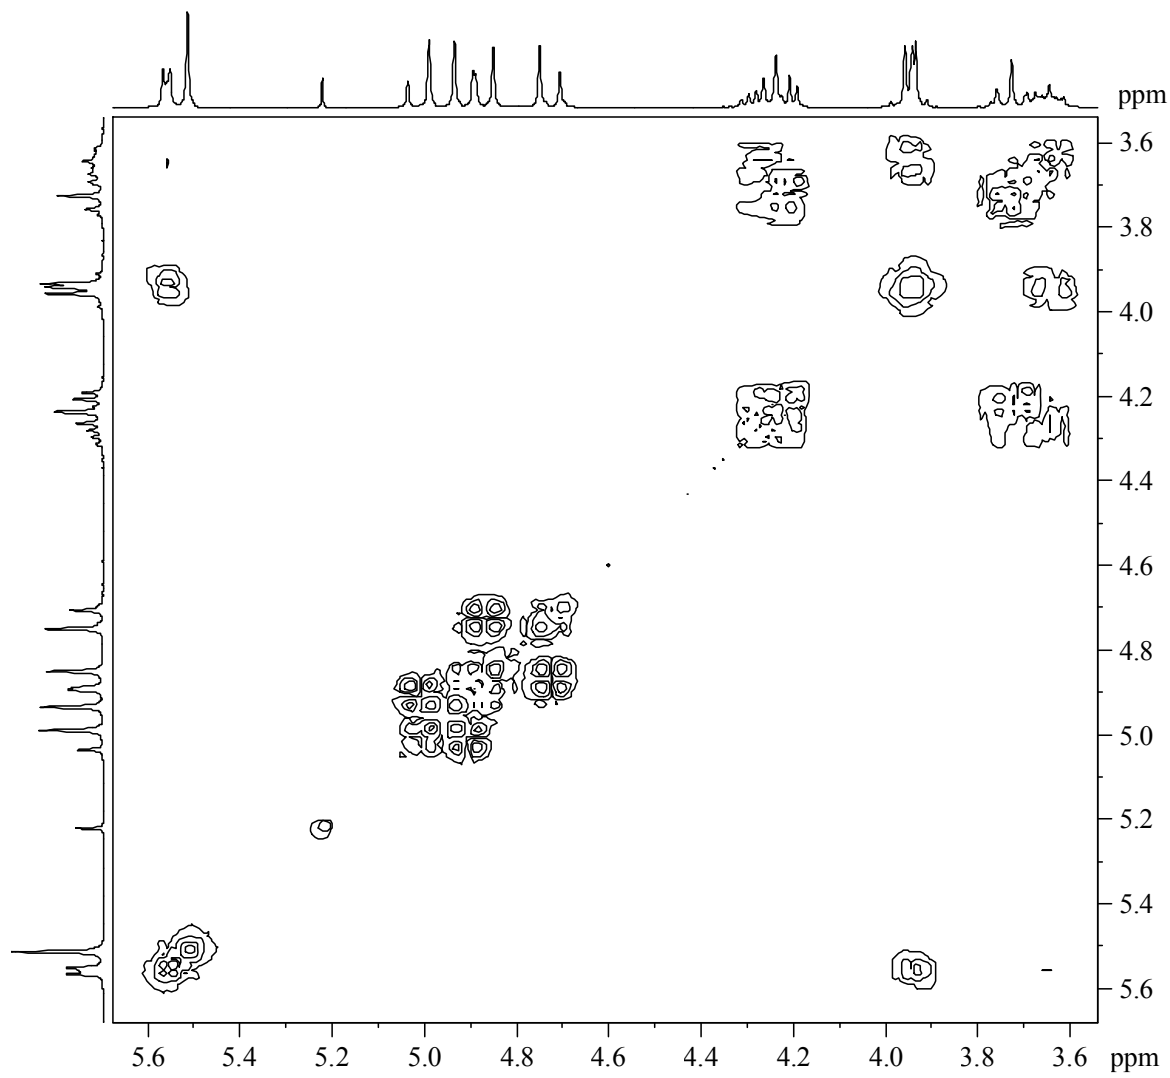

CDCl<sub>3</sub> 300 MHz

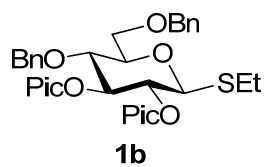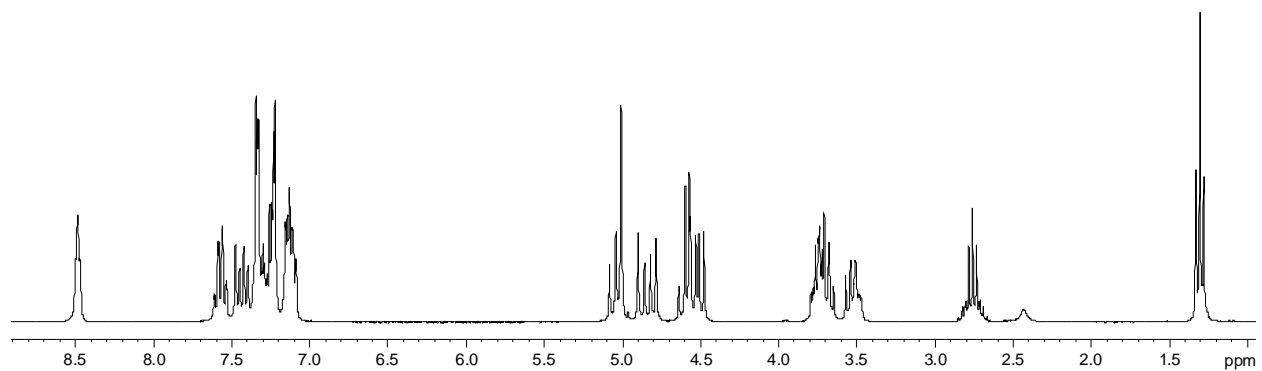

CDCl<sub>3</sub> 300 MHz

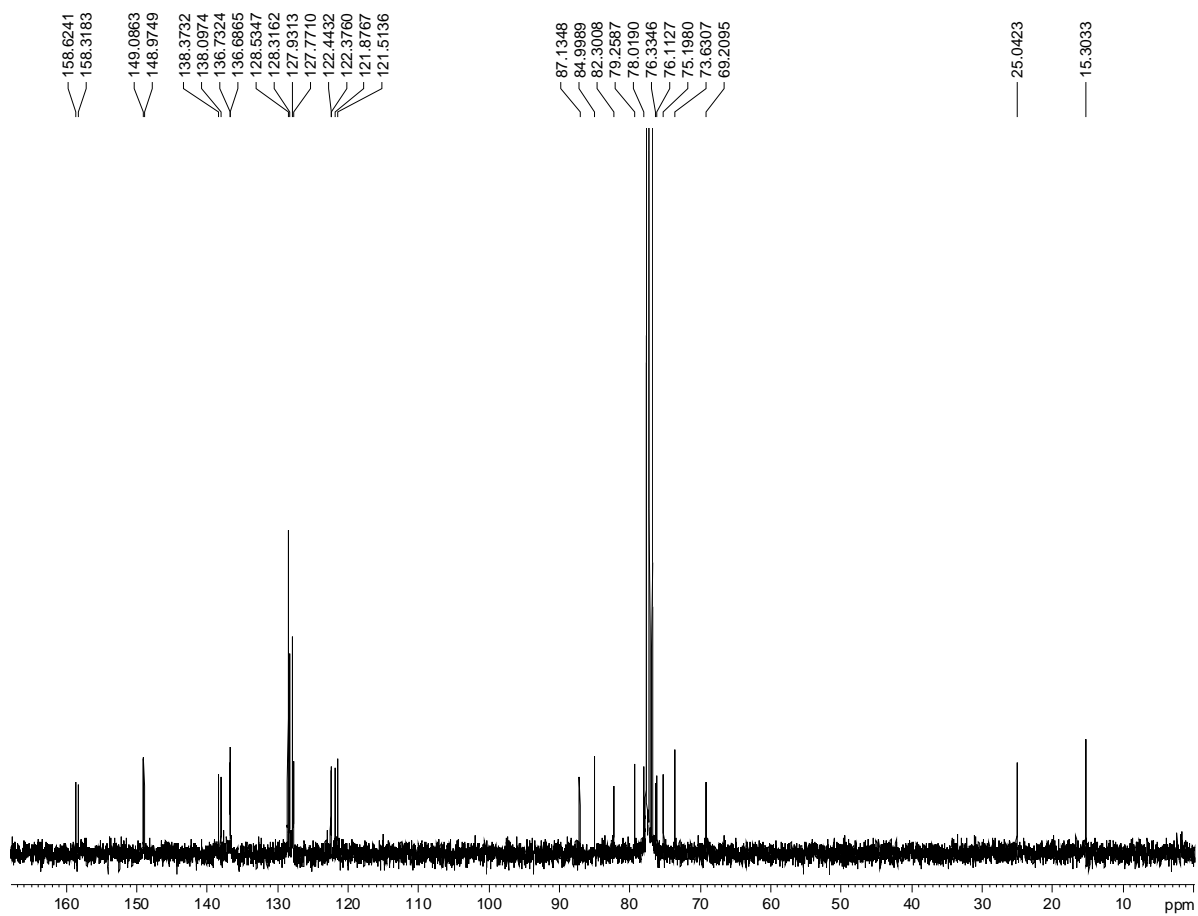

CDCl<sub>3</sub> 75 MHz

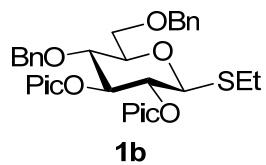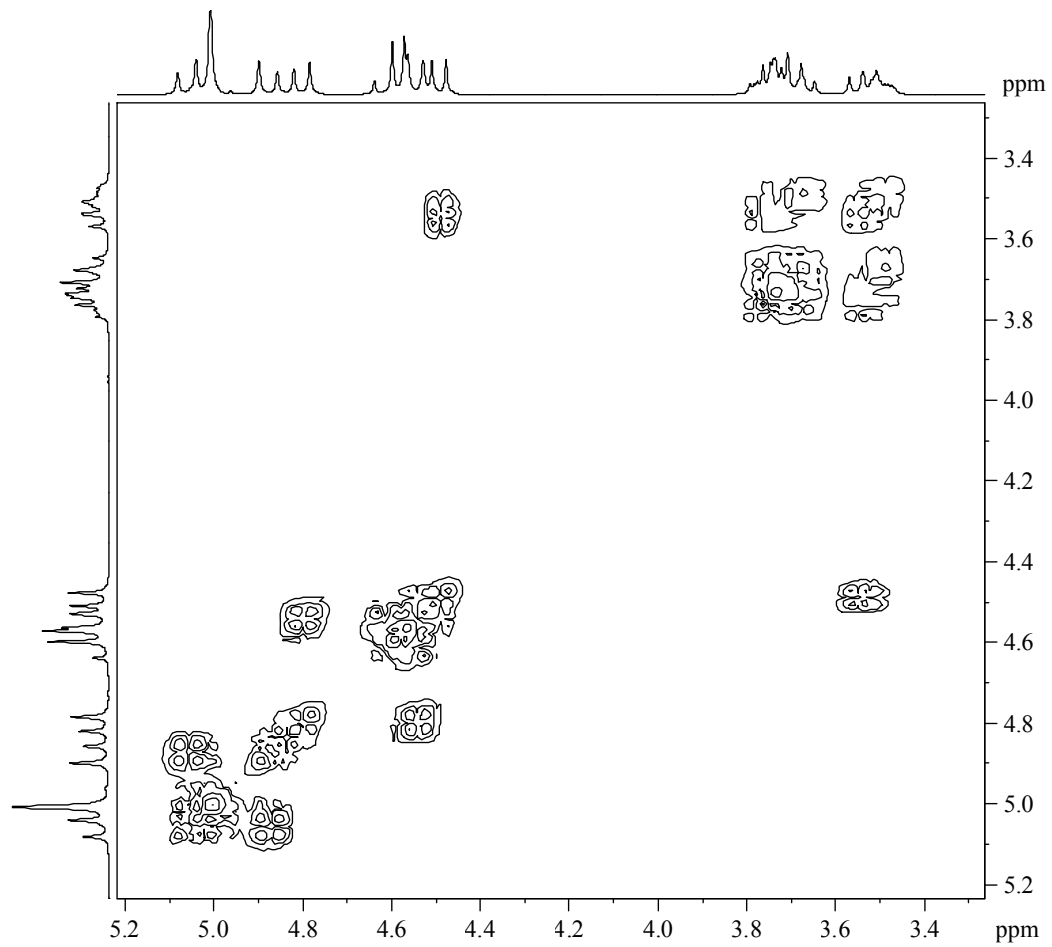

CDCl<sub>3</sub> 300 MHz

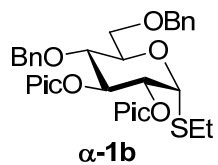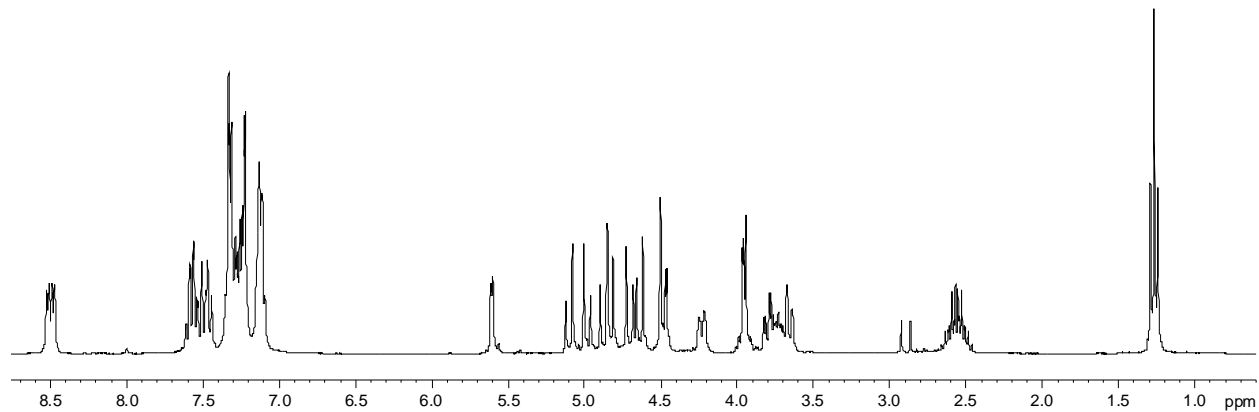

CDCl<sub>3</sub> 300 MHz

158.9760  
158.2296  
149.0626  
148.8662  
138.2928  
138.0158  
136.7792  
136.5688  
128.4932  
128.4278  
128.0401  
127.8306  
127.7603  
122.4724  
122.2573  
121.6823  
121.4957

83.1341  
82.7960  
80.0229  
77.5690  
76.2434  
75.1105  
73.6253  
72.7533  
70.5573  
68.6307

23.8208

14.8909

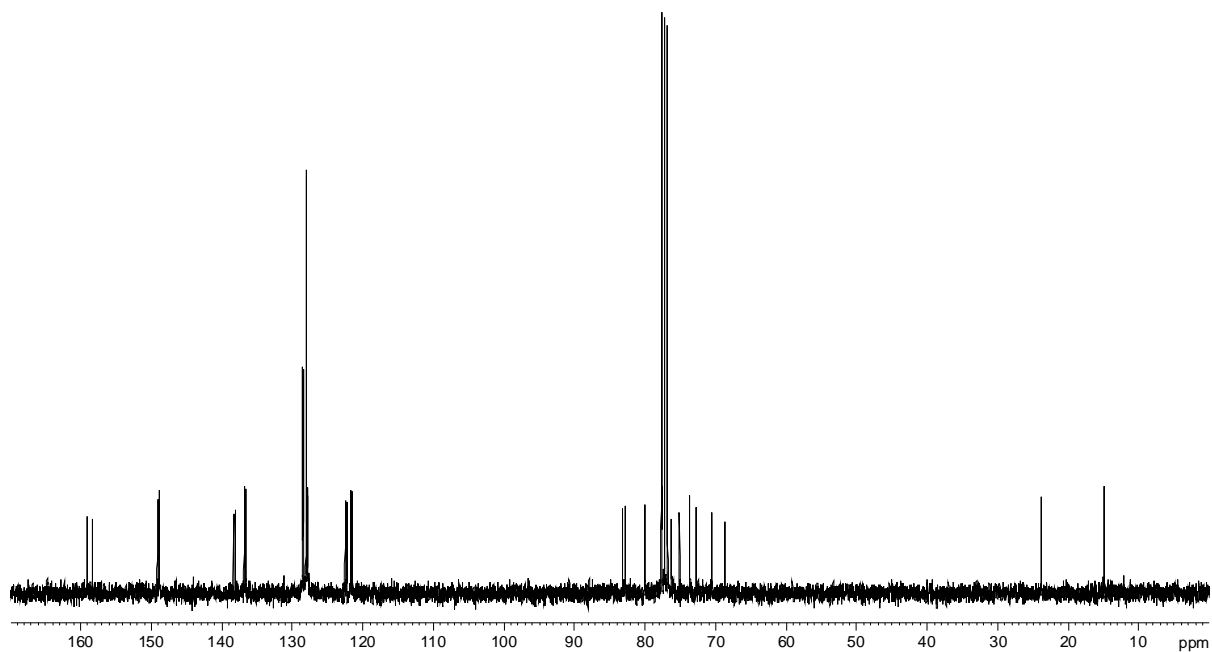

CDCl<sub>3</sub> 75 MHz



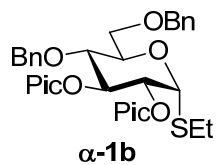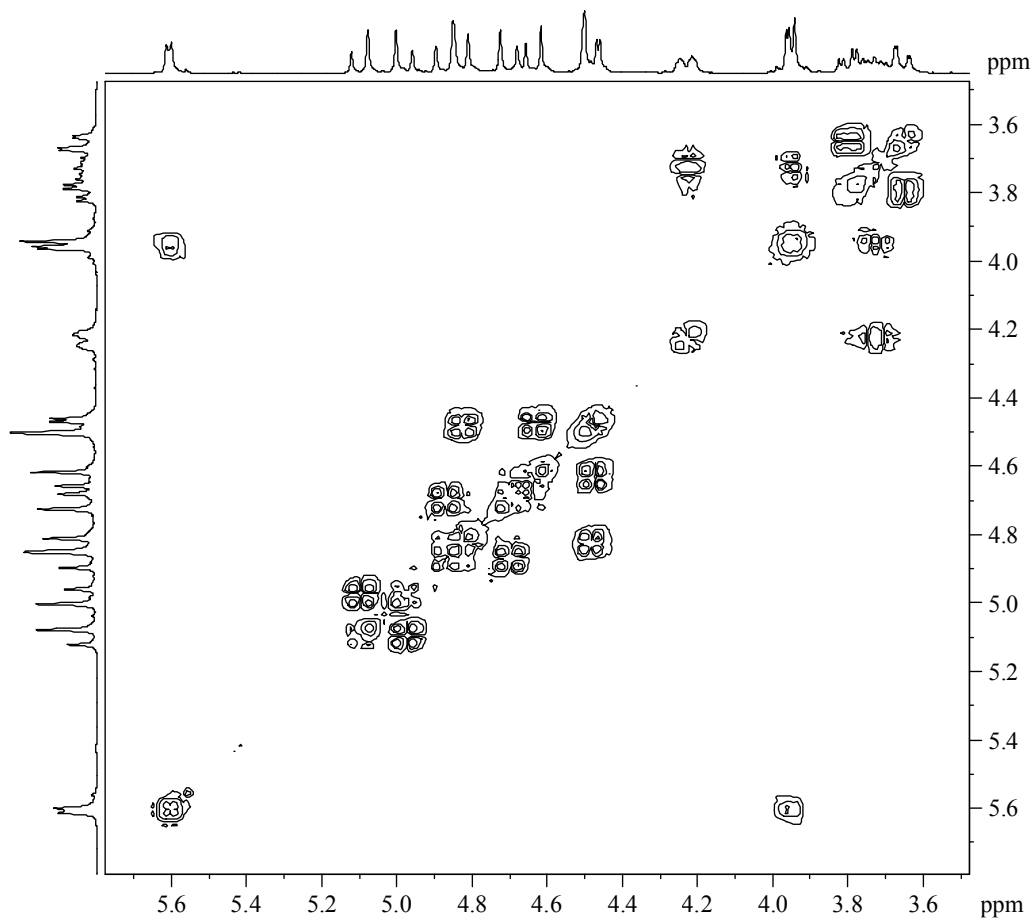

$\text{CDCl}_3$  300 MHz

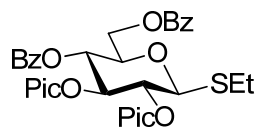

**1c**

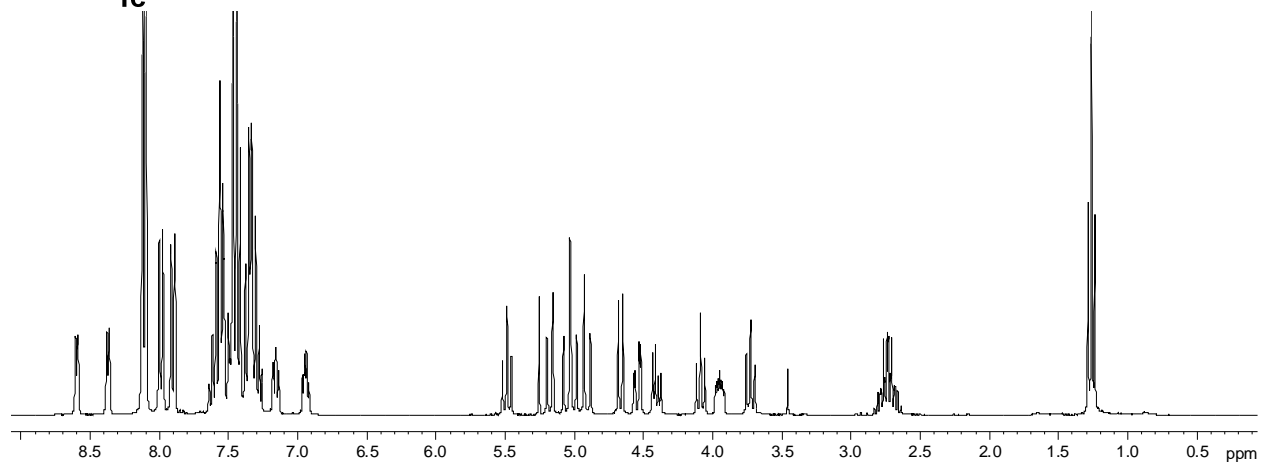

CDCl<sub>3</sub> 300 MHz

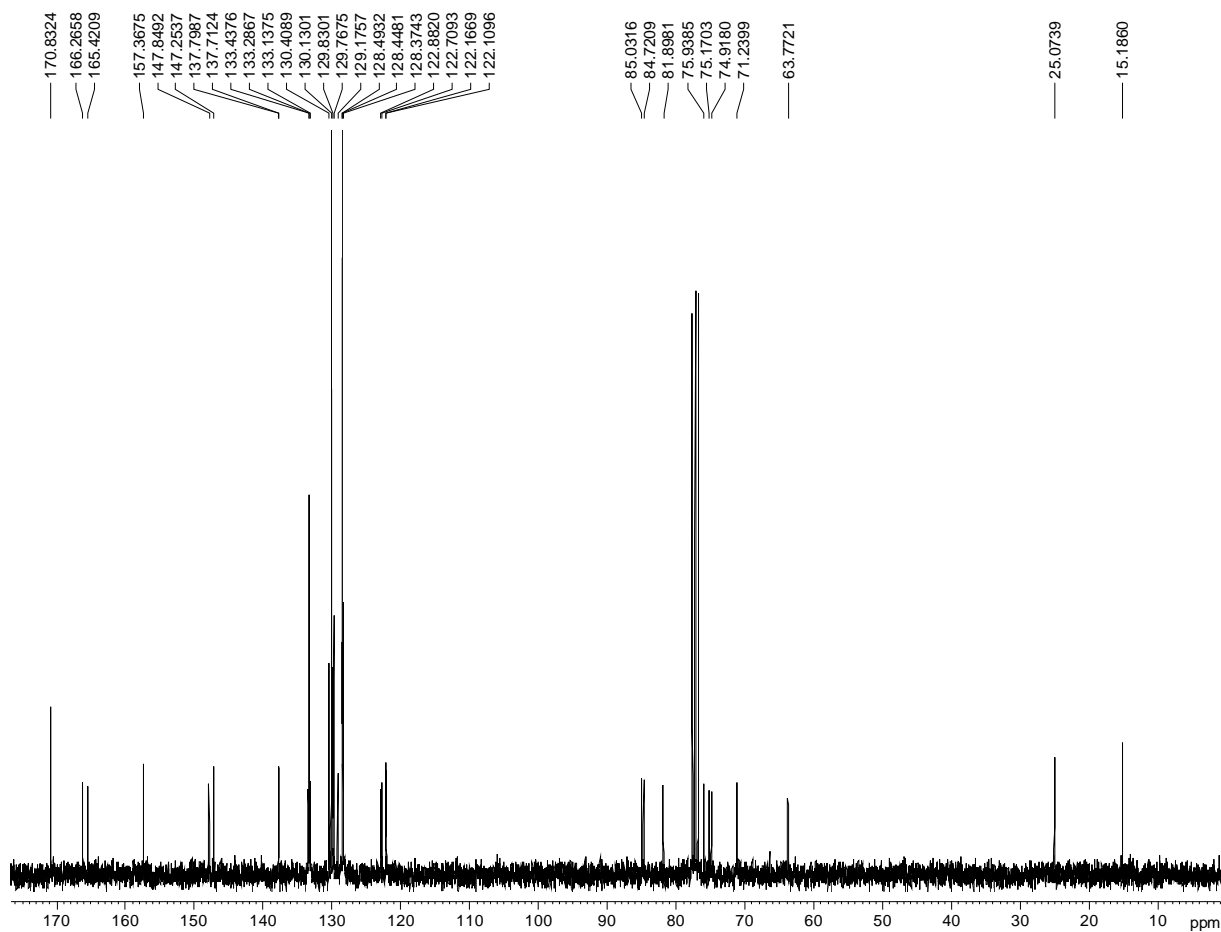

CDCl<sub>3</sub> 75 MHz

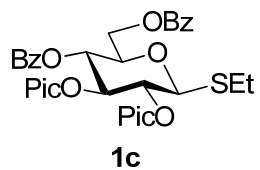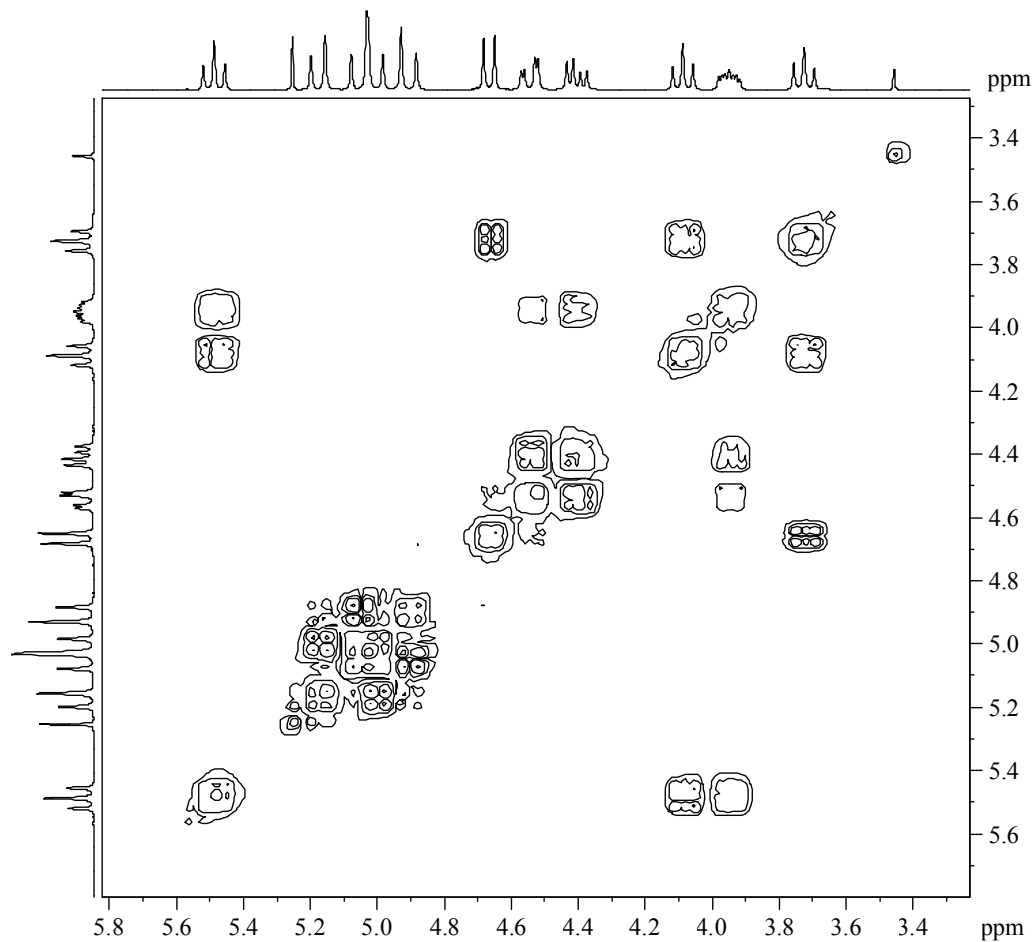

CDCl<sub>3</sub> 300 MHz

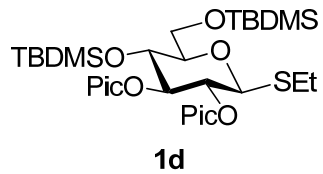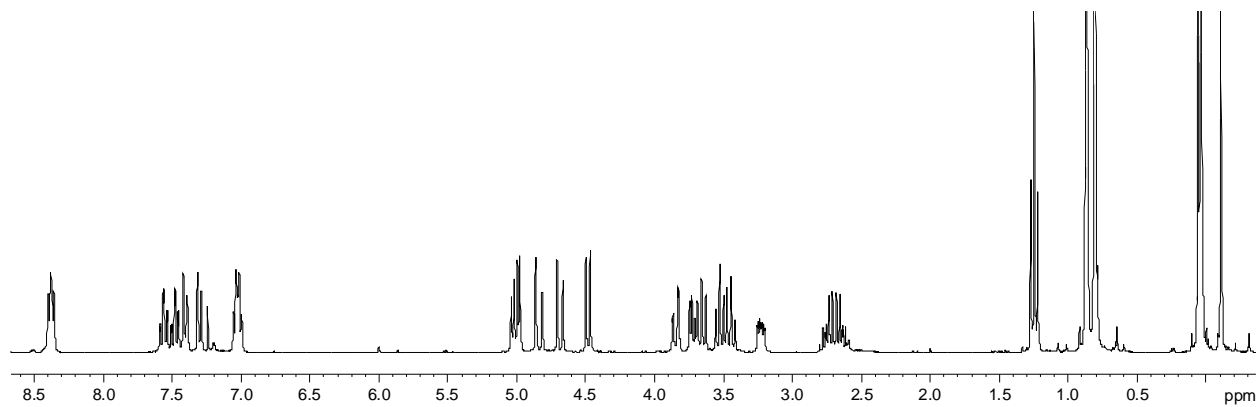

CDCl<sub>3</sub> 300 MHz

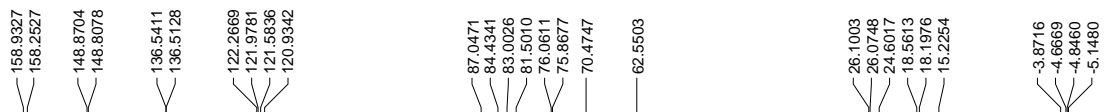

CDCl<sub>3</sub> 75 MHz

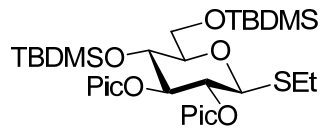

**1d**

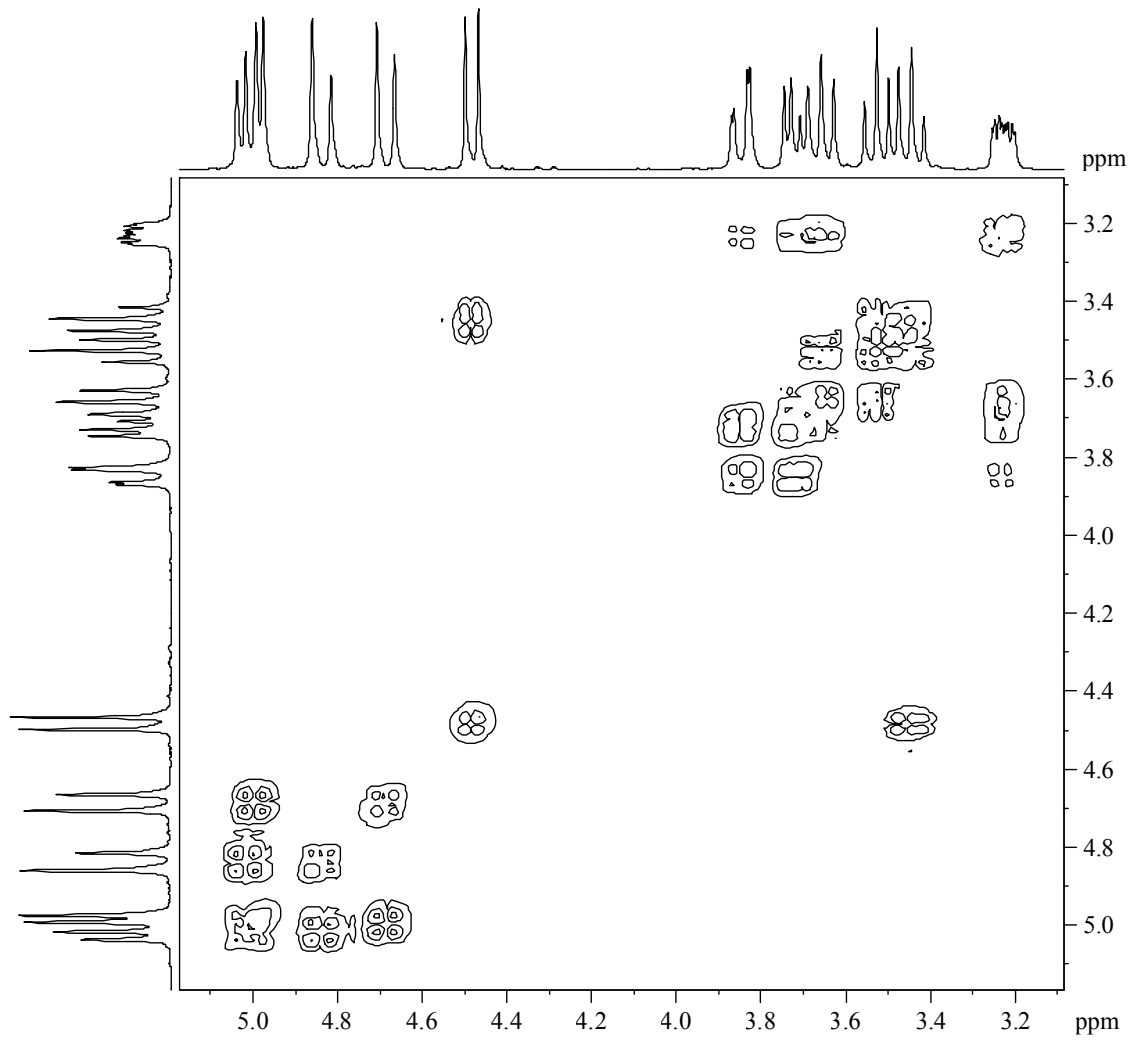

CDCl<sub>3</sub> 300 MHz

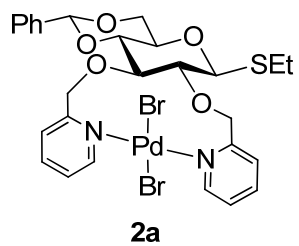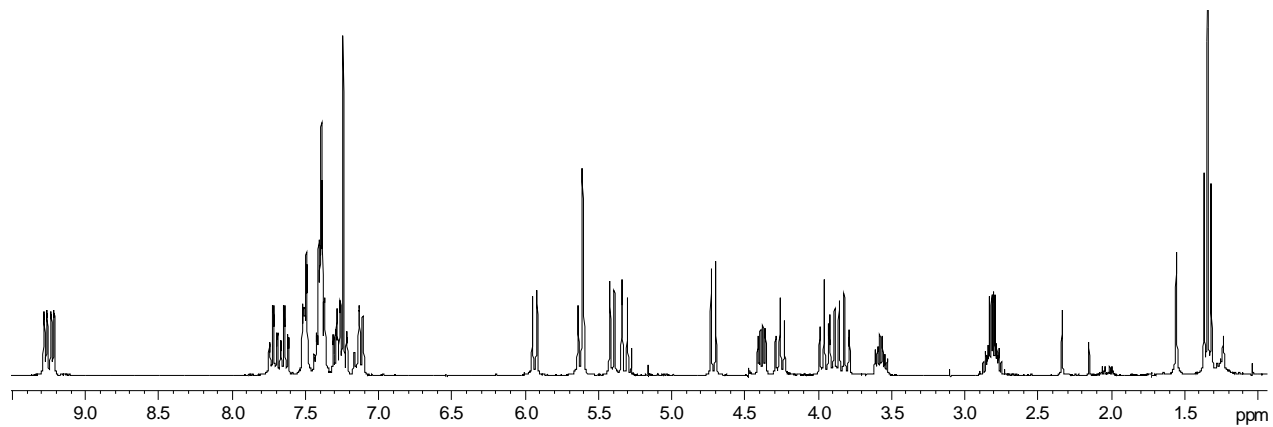

CDCl<sub>3</sub> 300 MHz

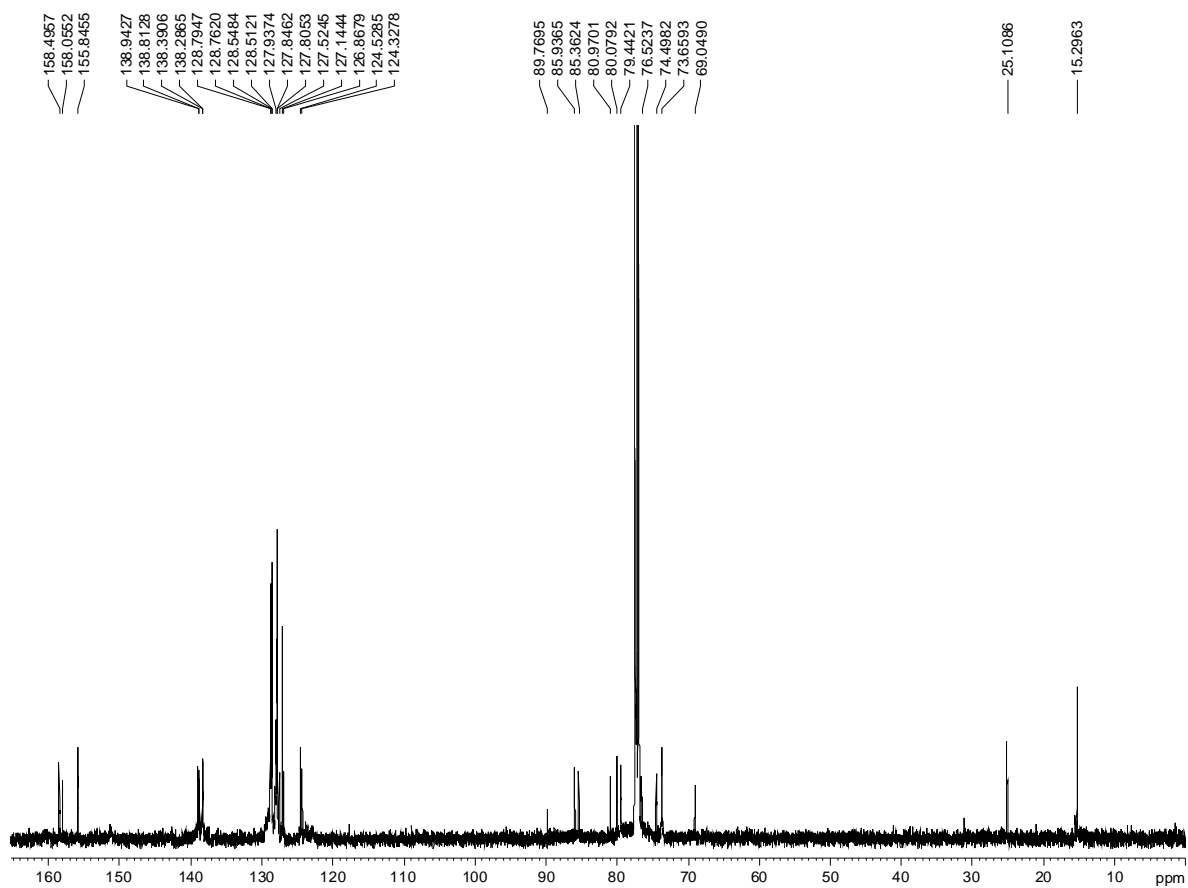

CDCl<sub>3</sub> 75 MHz

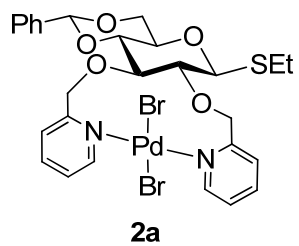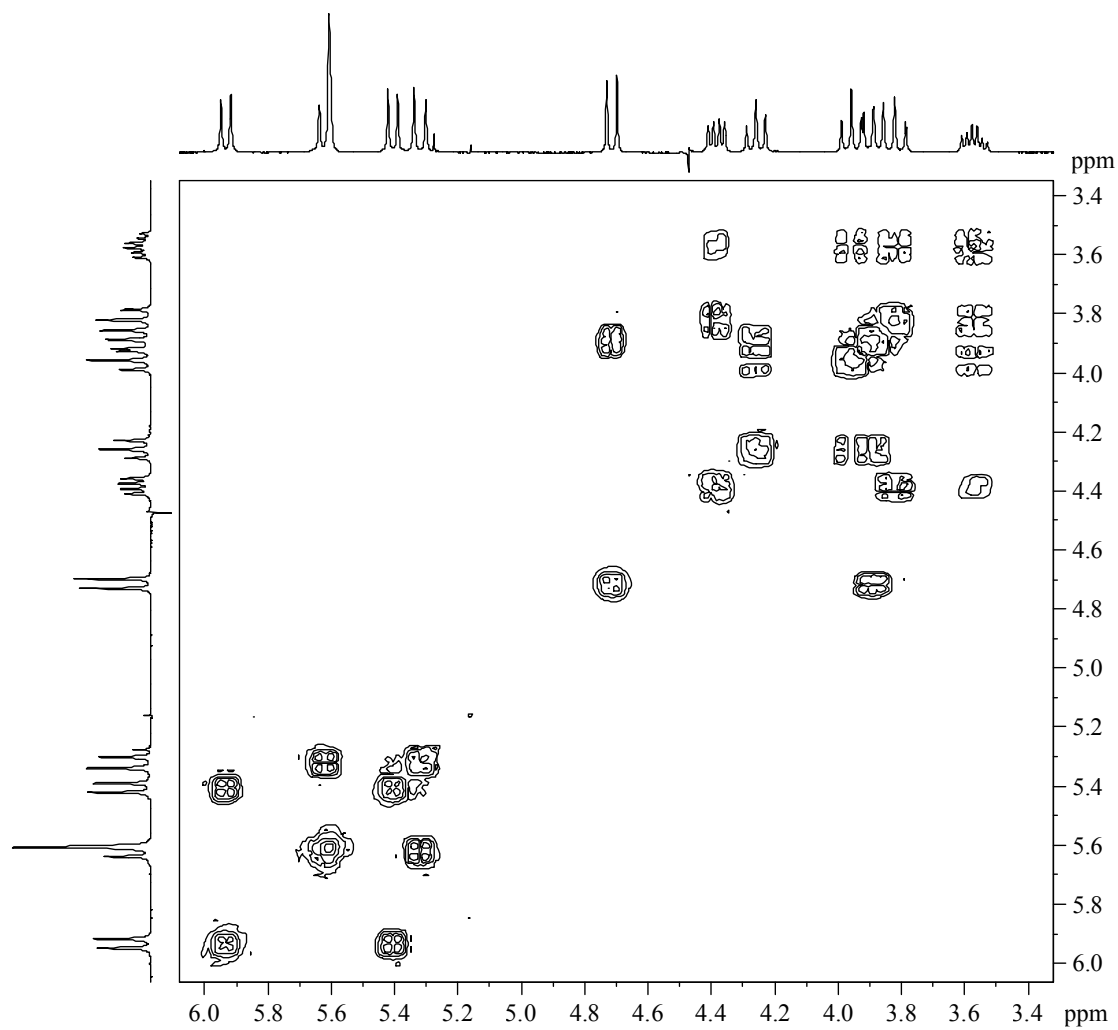

CDCl<sub>3</sub> 300 MHz

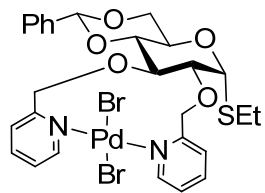

**$\alpha$ -2a**

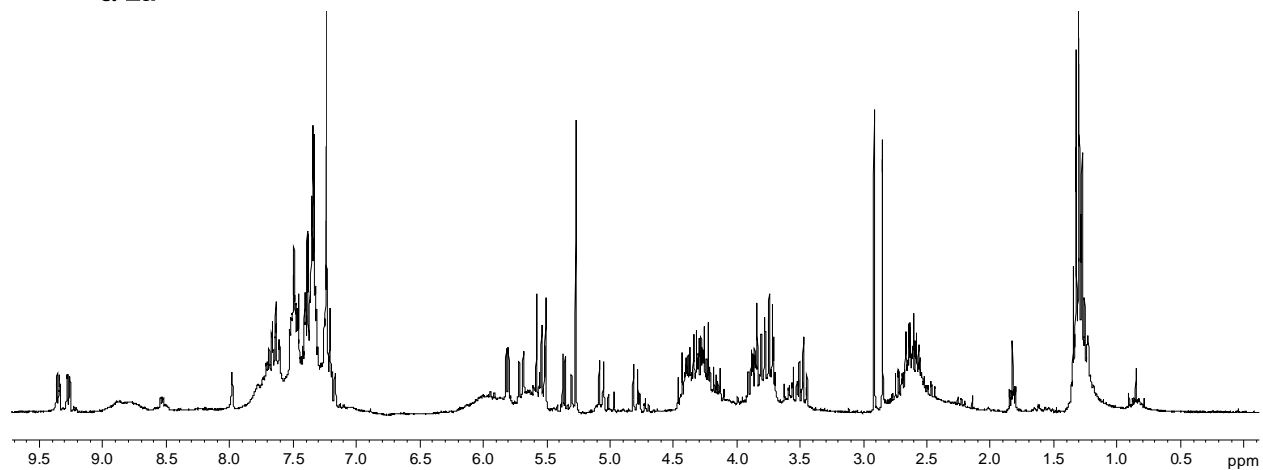

CDCl<sub>3</sub> 300 MHz

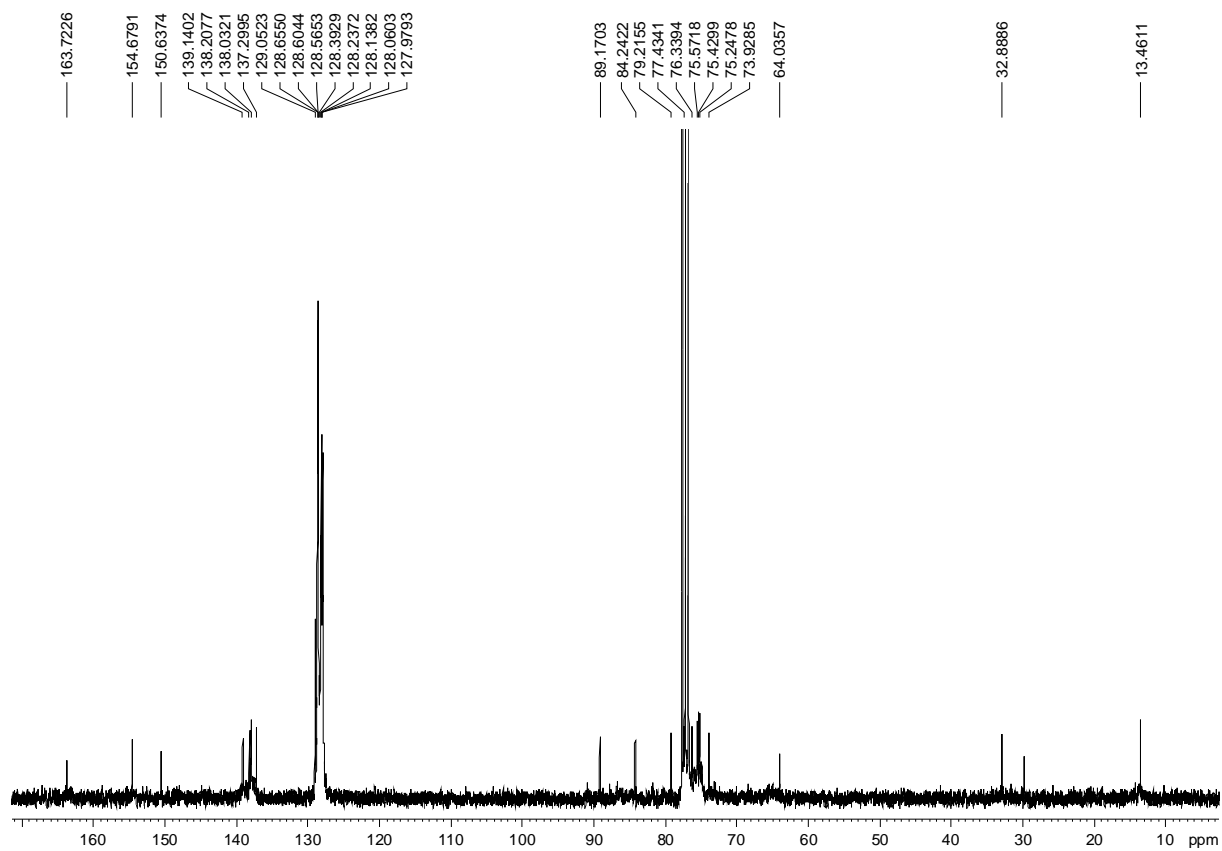

CDCl<sub>3</sub> 75 MHz



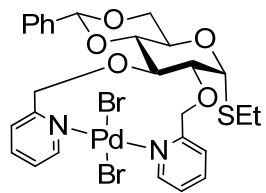

**$\alpha$ -2a**

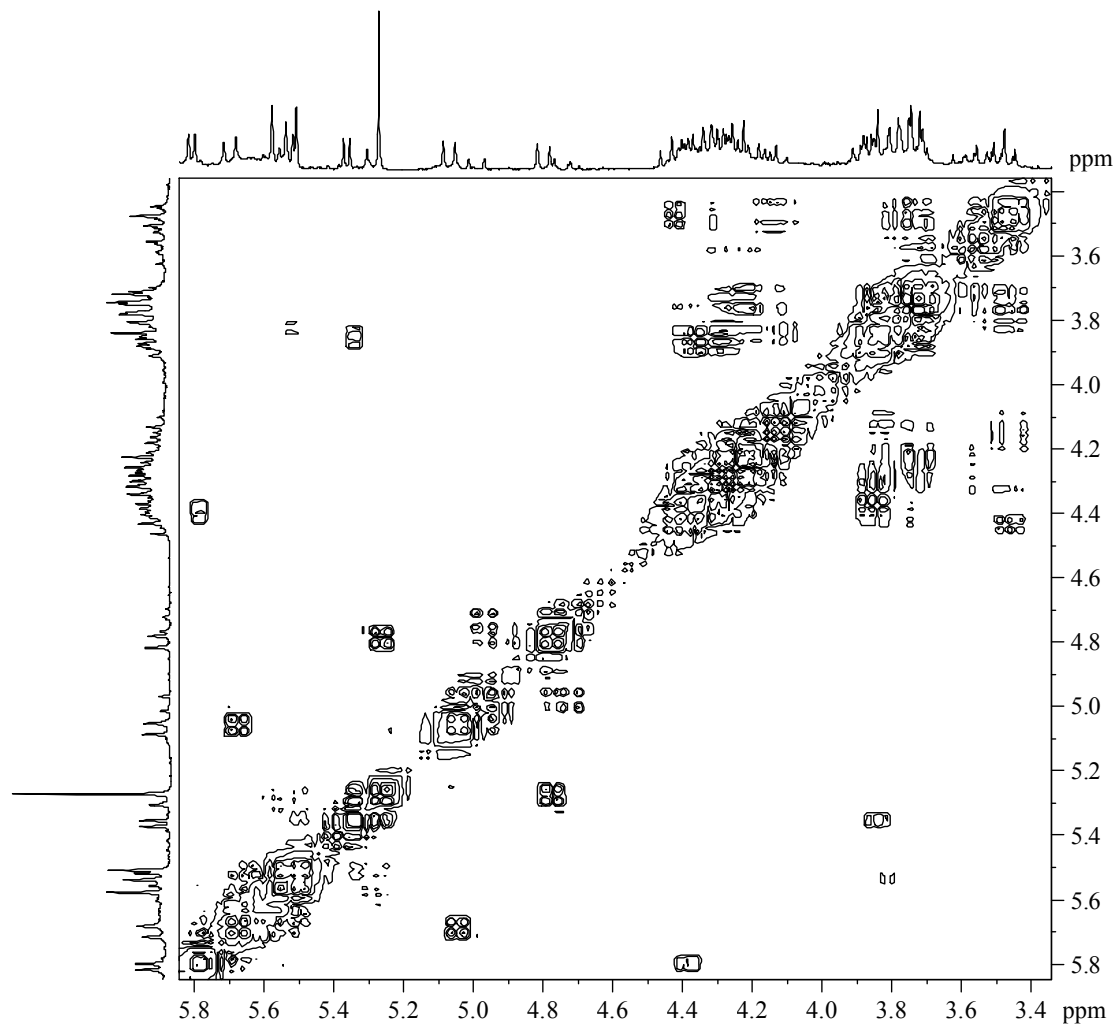

CDCl<sub>3</sub> 300 MHz

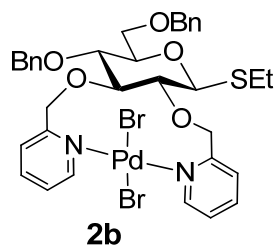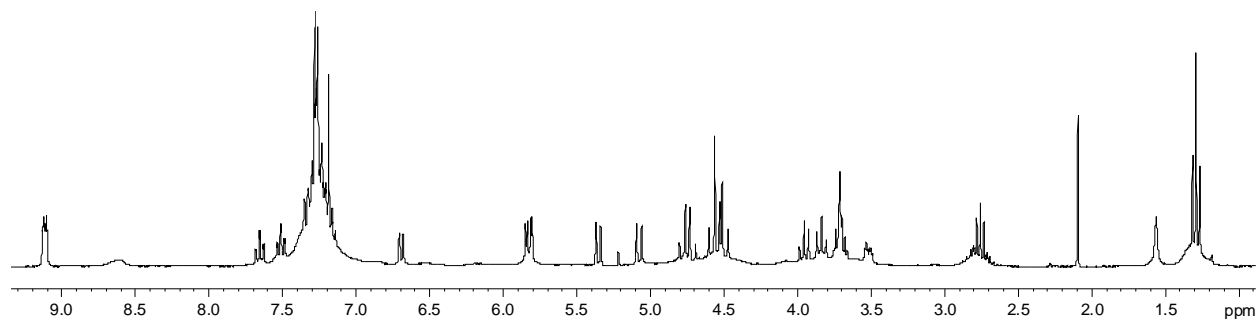

CDCl<sub>3</sub> 300 MHz

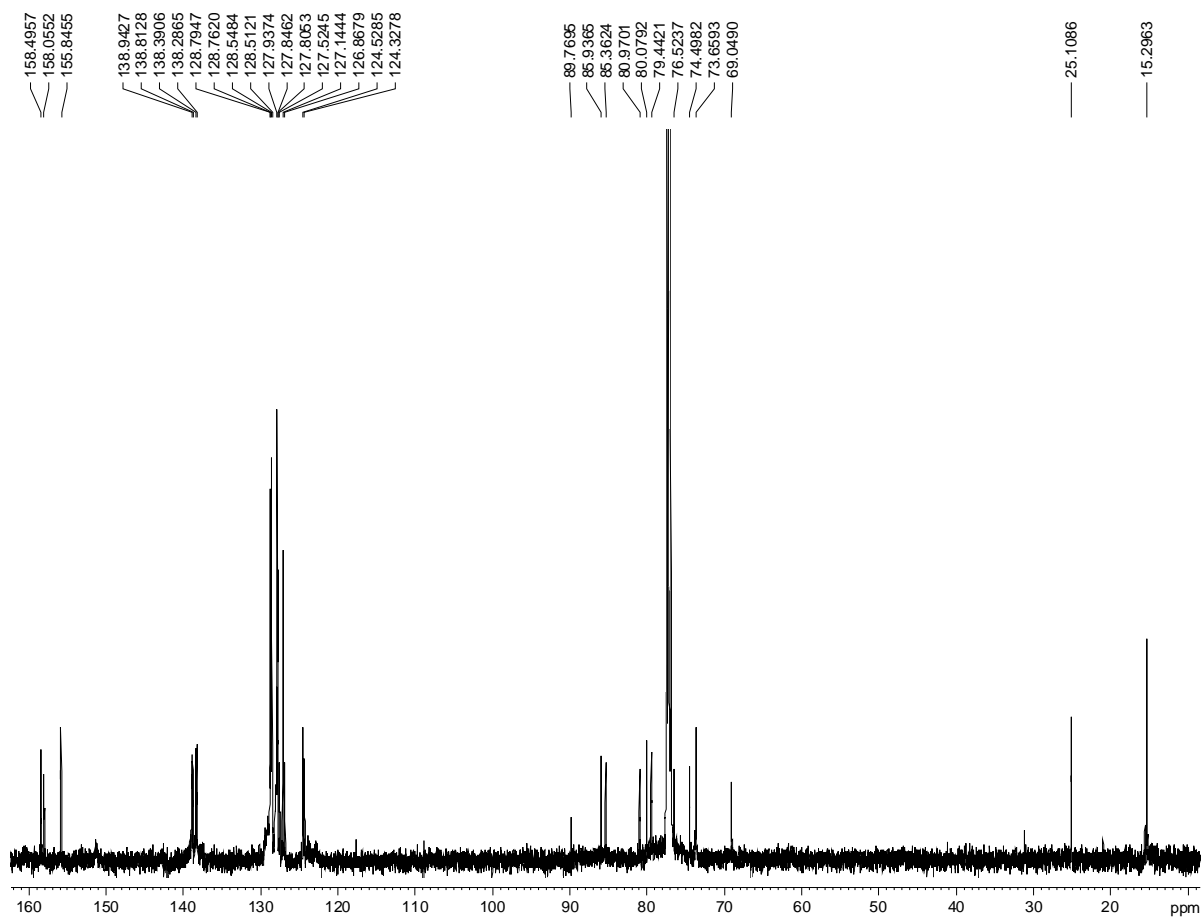

CDCl<sub>3</sub> 75 MHz







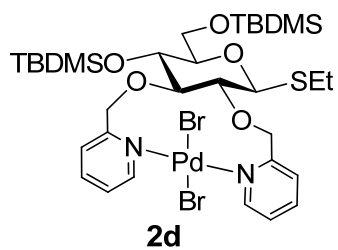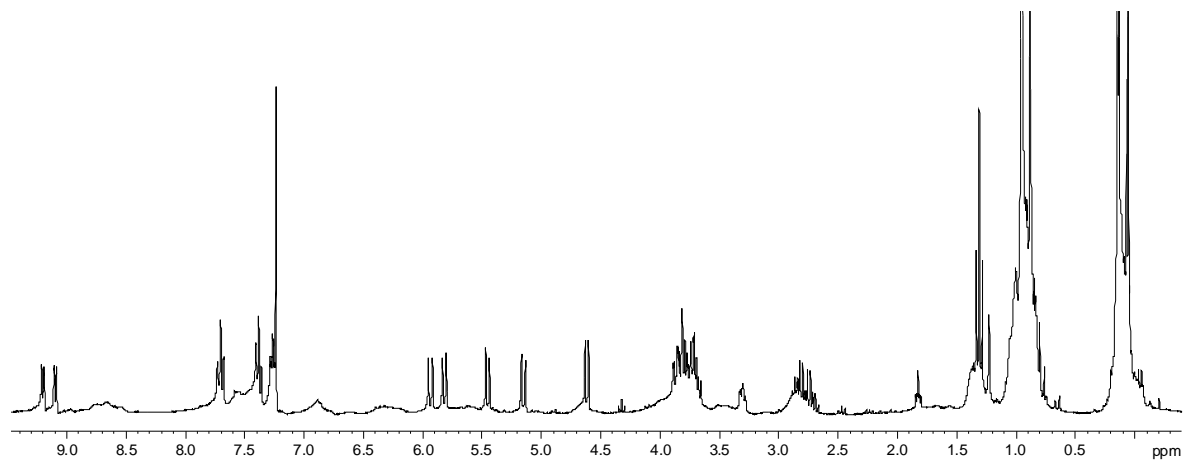

CDCl<sub>3</sub> 300 MHz

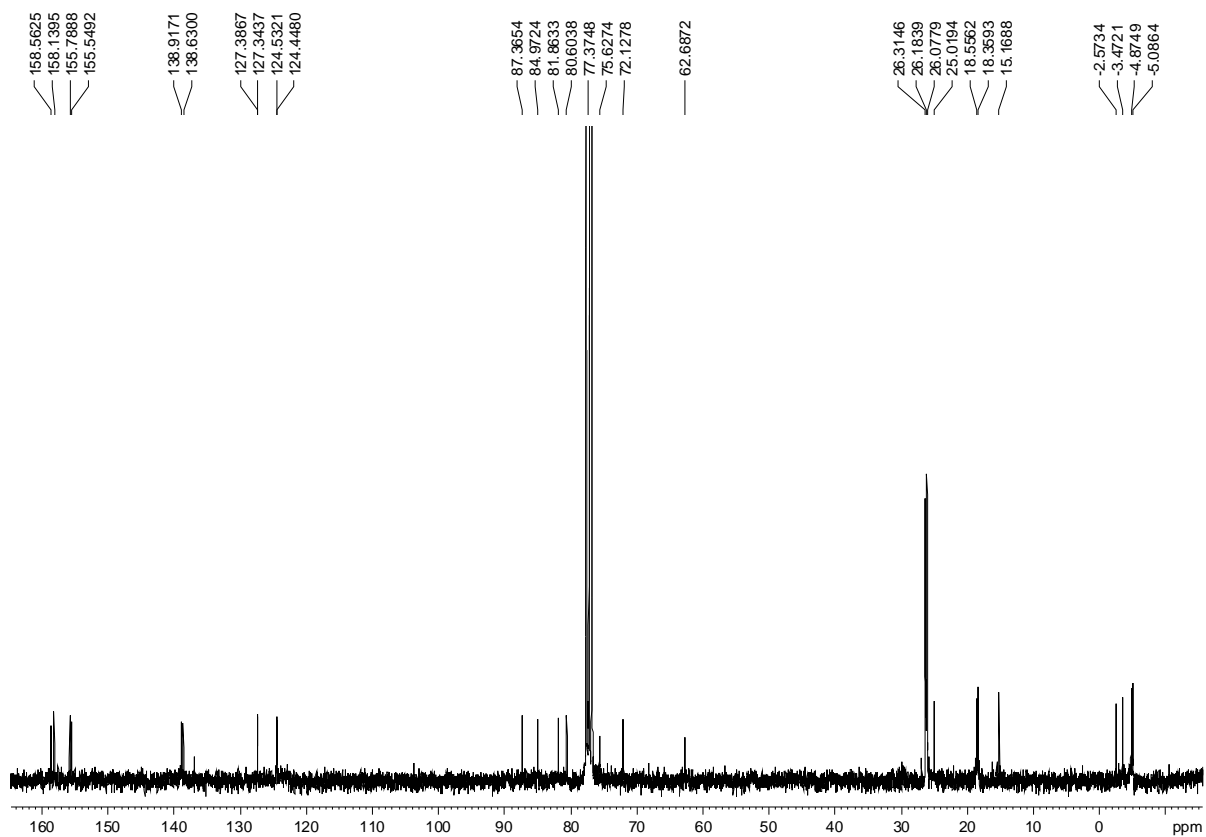

CDCl<sub>3</sub> 75 MHz

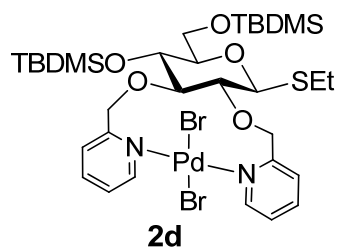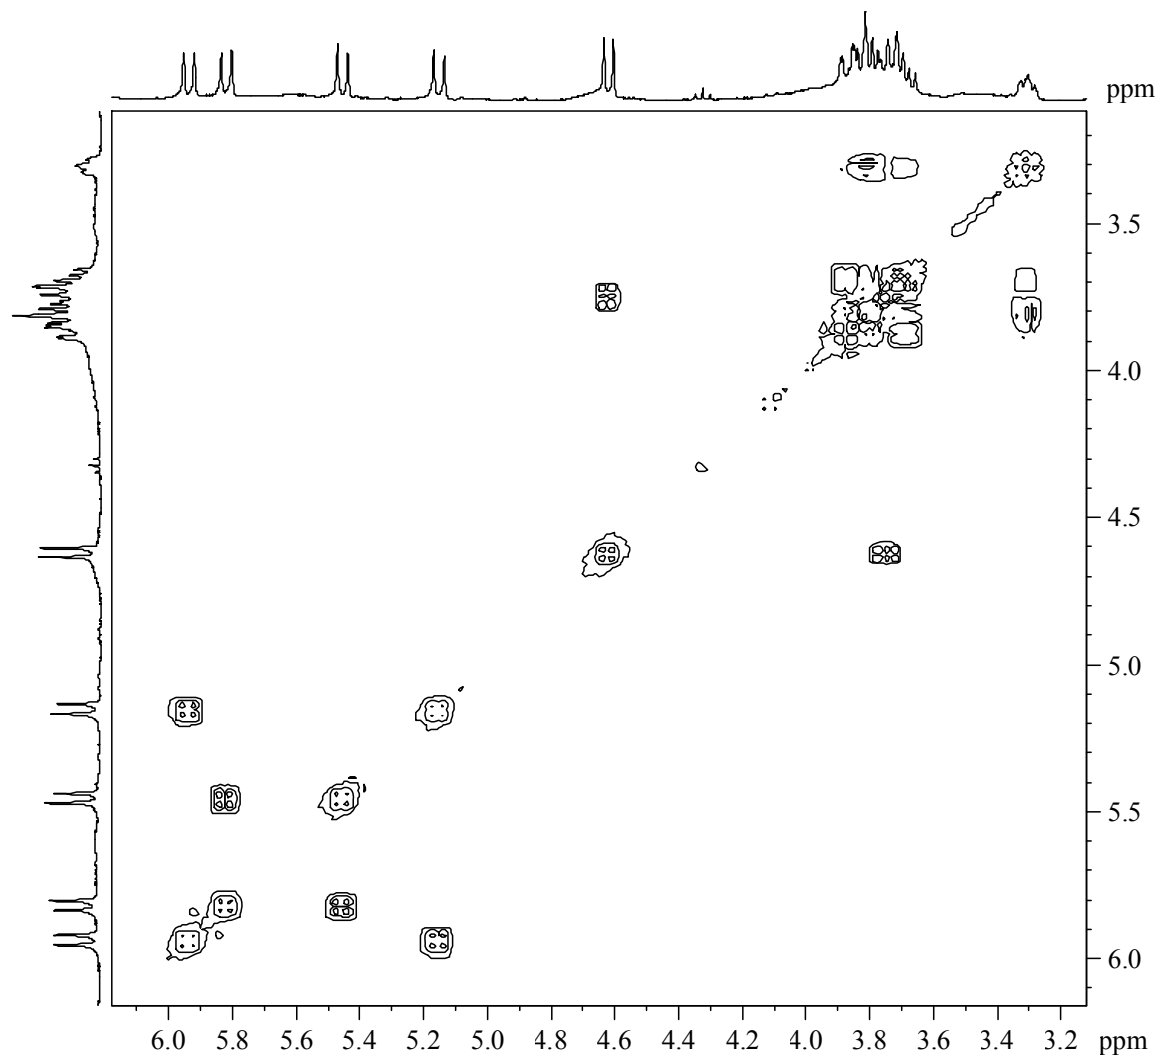

CDCl<sub>3</sub> 300 MHz

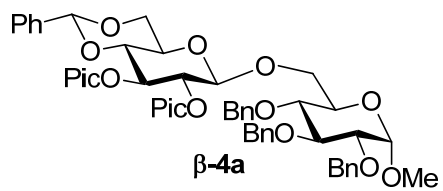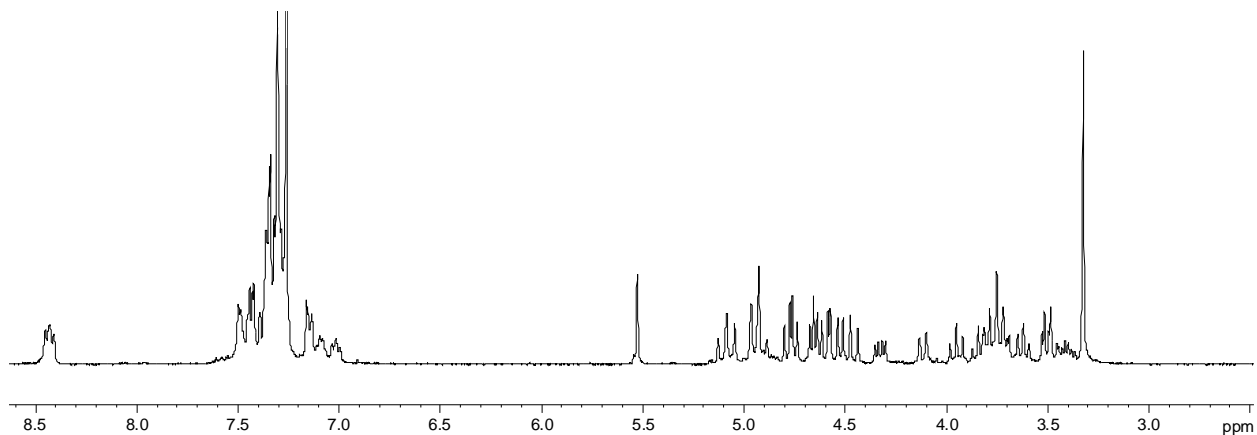

CDCl<sub>3</sub> 300 MHz

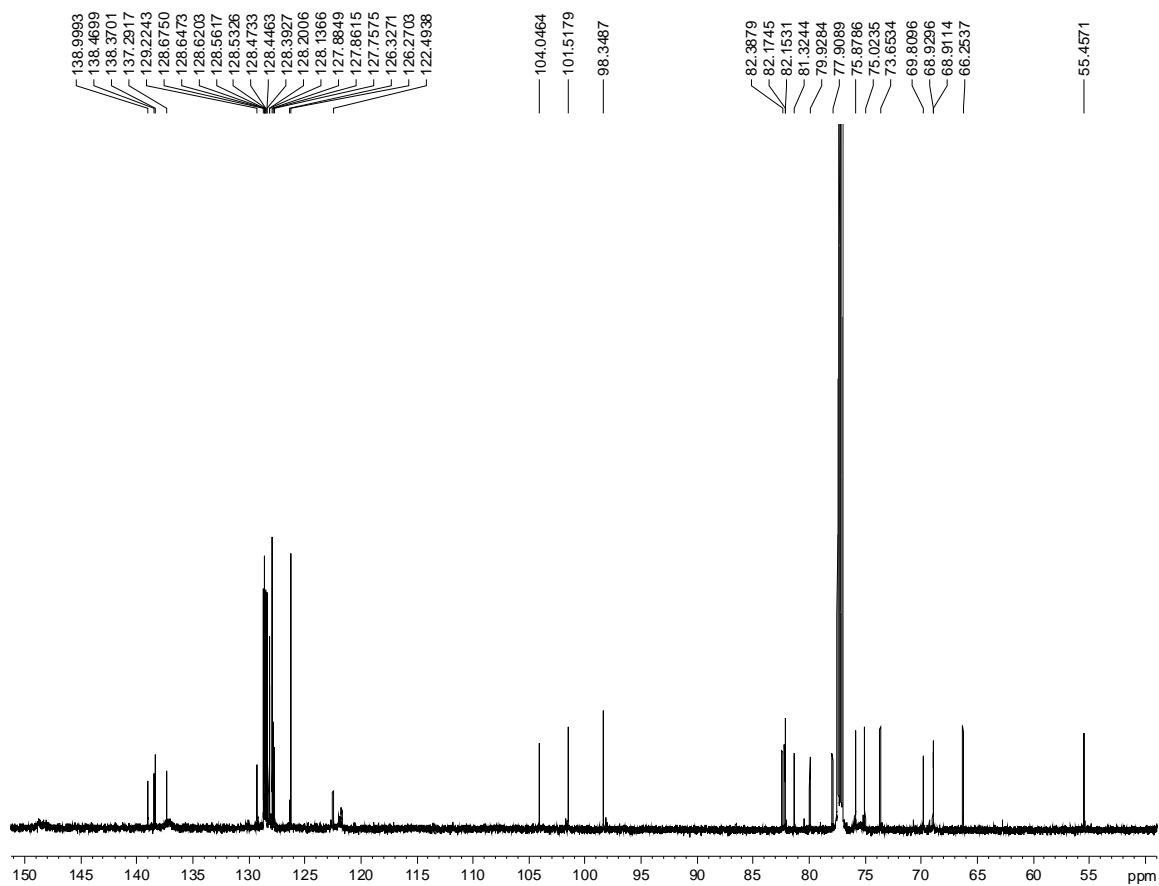

CDCl<sub>3</sub> 150 MHz



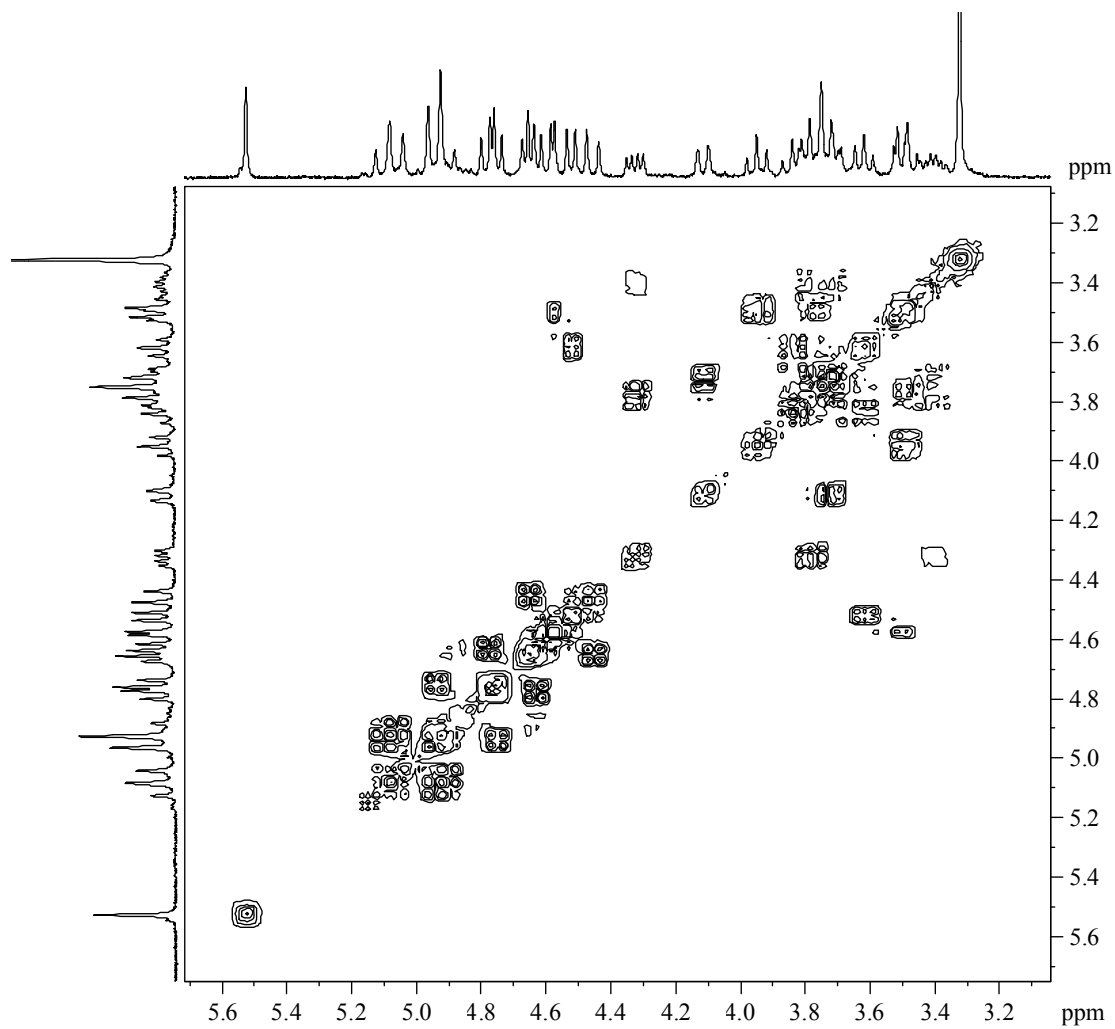

$\text{CDCl}_3$  300 MHz

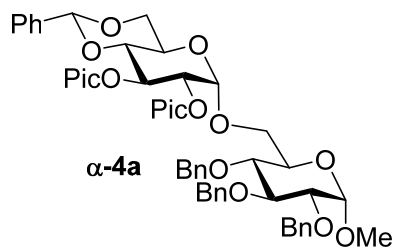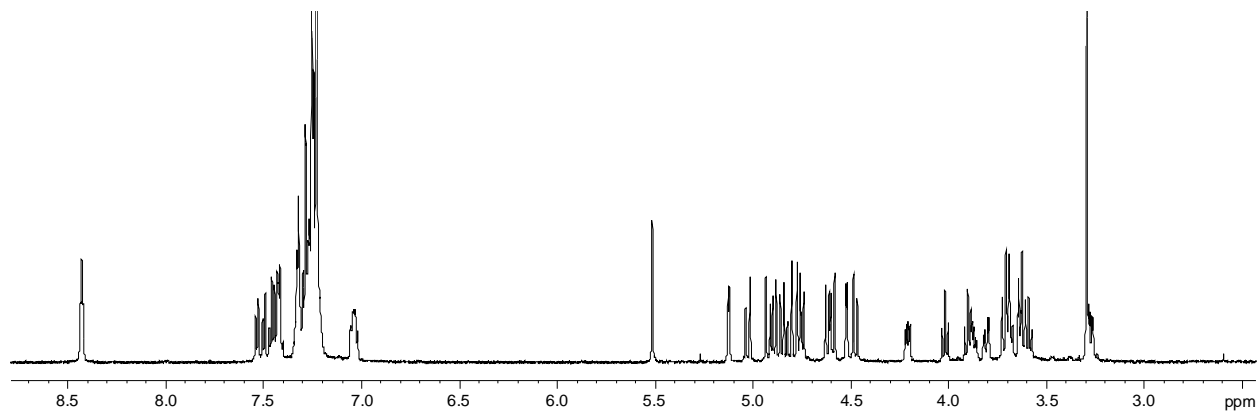

CDCl<sub>3</sub> 600 MHz

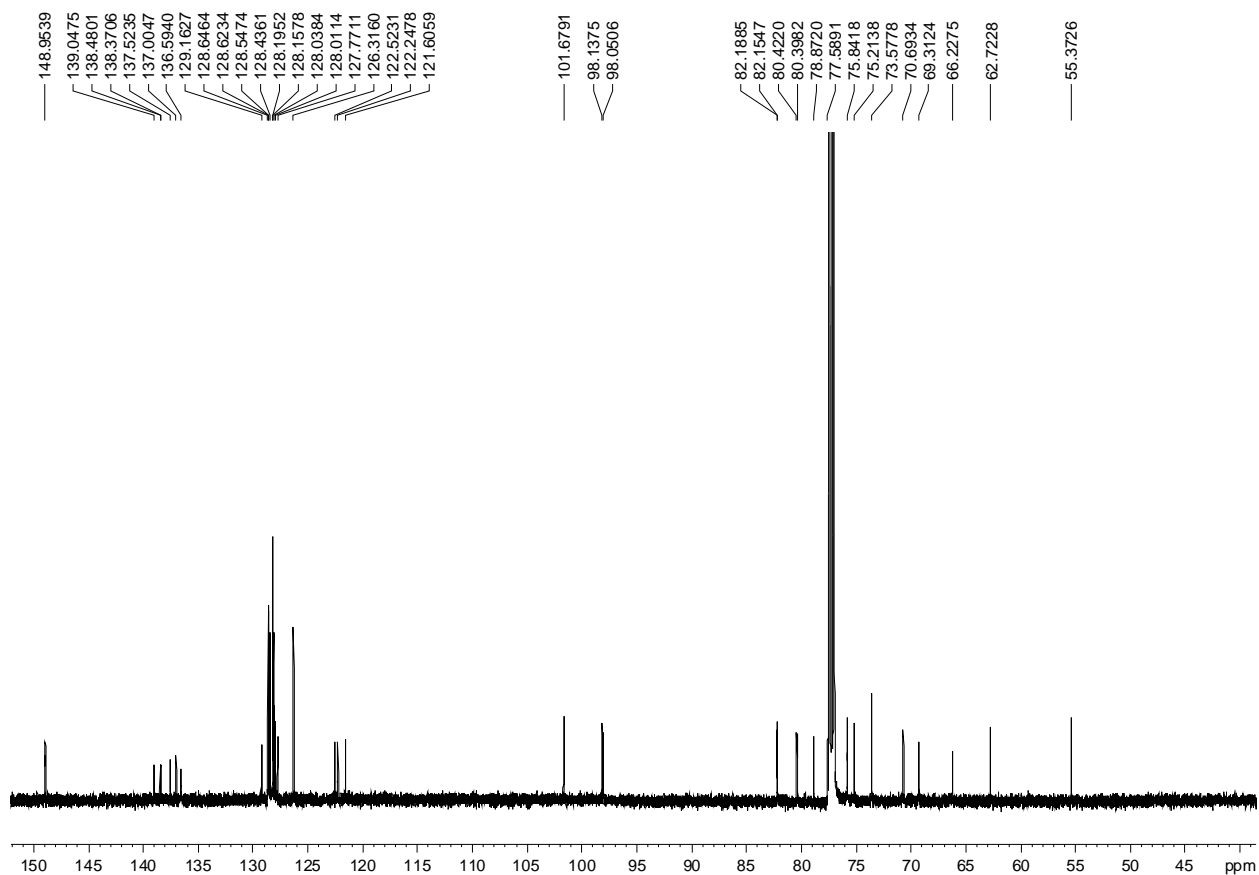

CDCl<sub>3</sub> 150 MHz



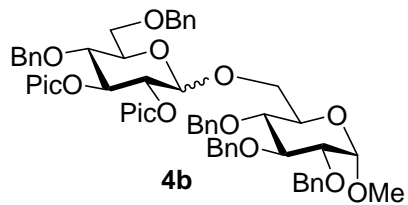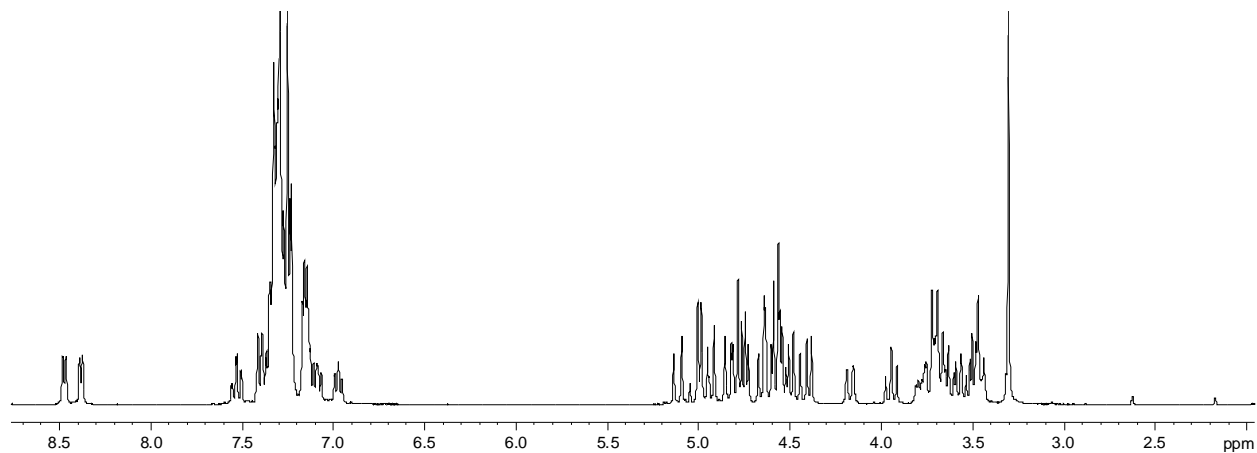

CDCl<sub>3</sub> 300 MHz

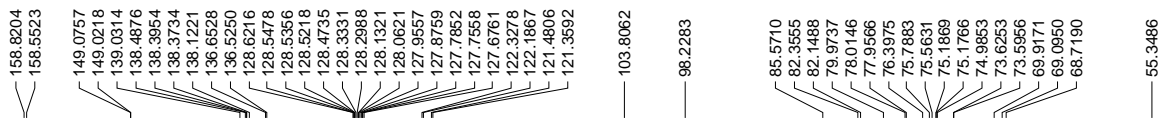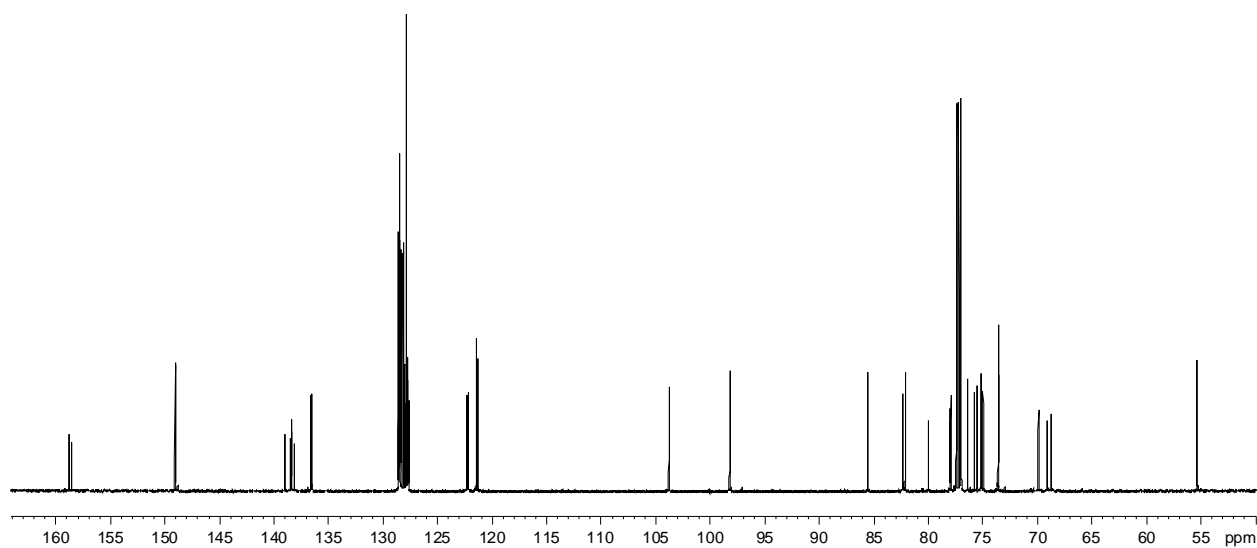

CDCl<sub>3</sub> 150 MHz



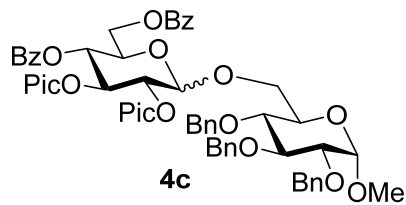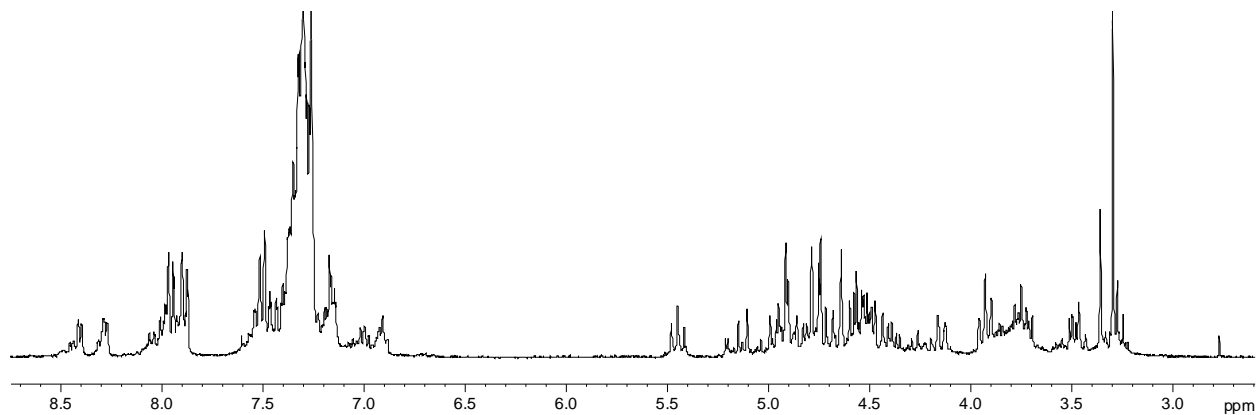

$\text{CDCl}_3$  300 MHz

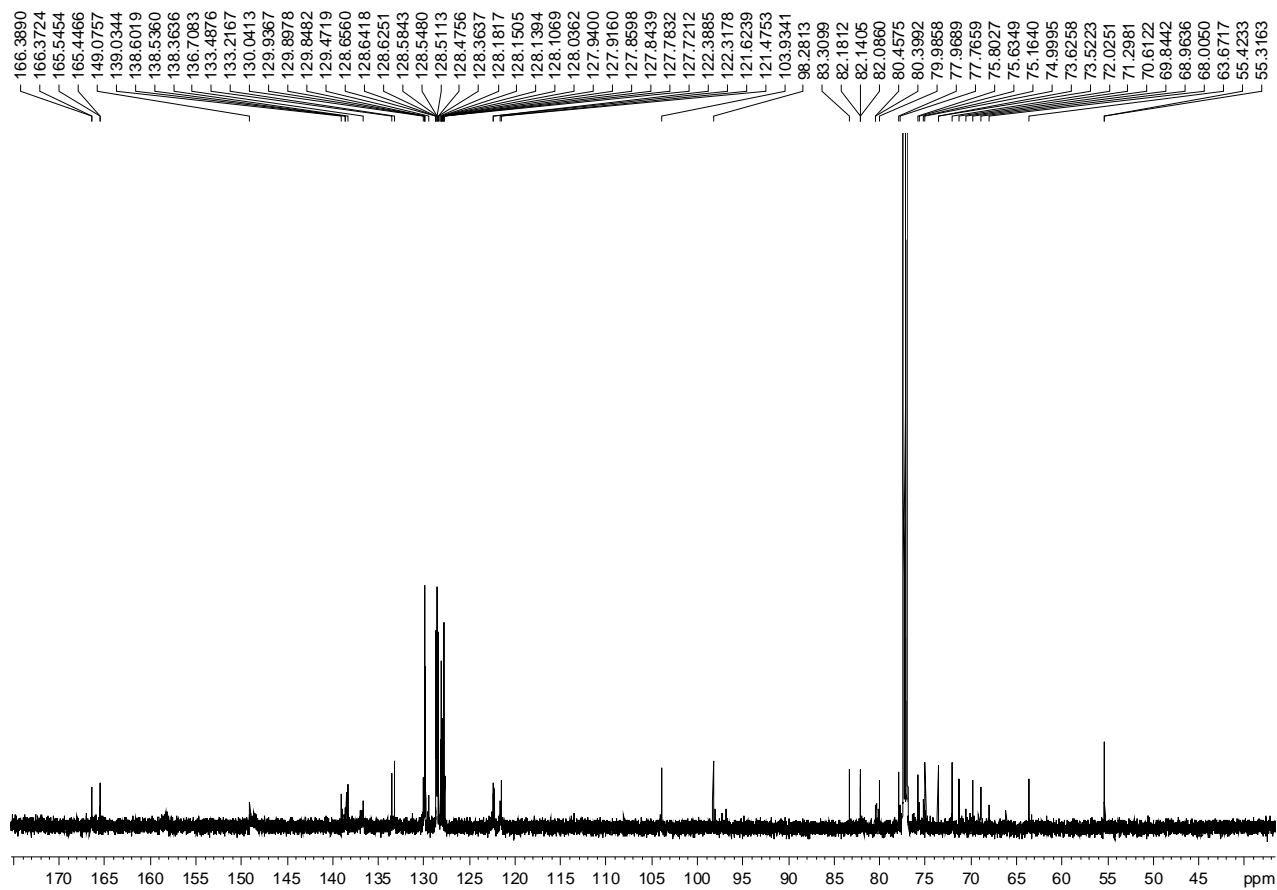

$\text{CDCl}_3$  150 MHz



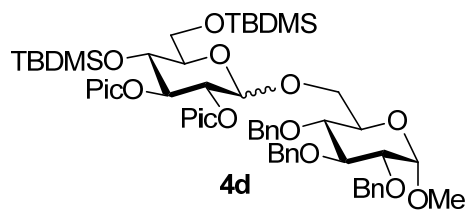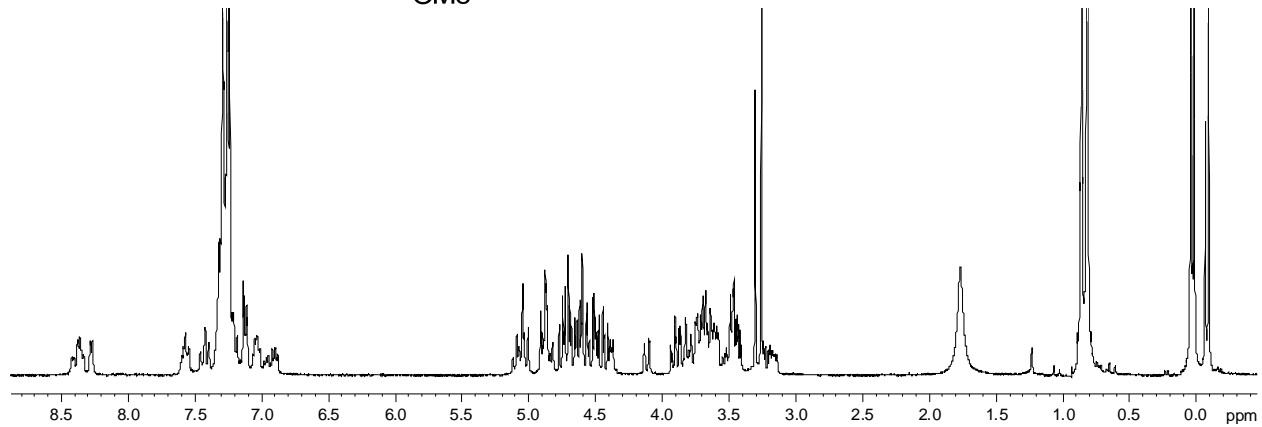

CDCl<sub>3</sub> 300 MHz

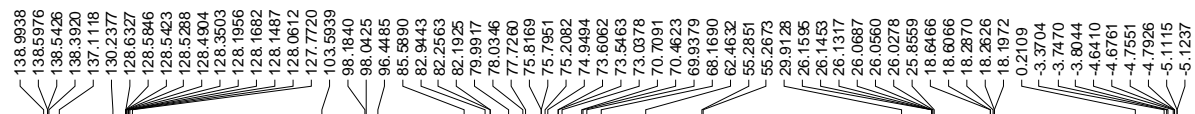

CDCl<sub>3</sub> 150 MHz





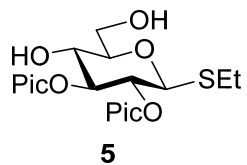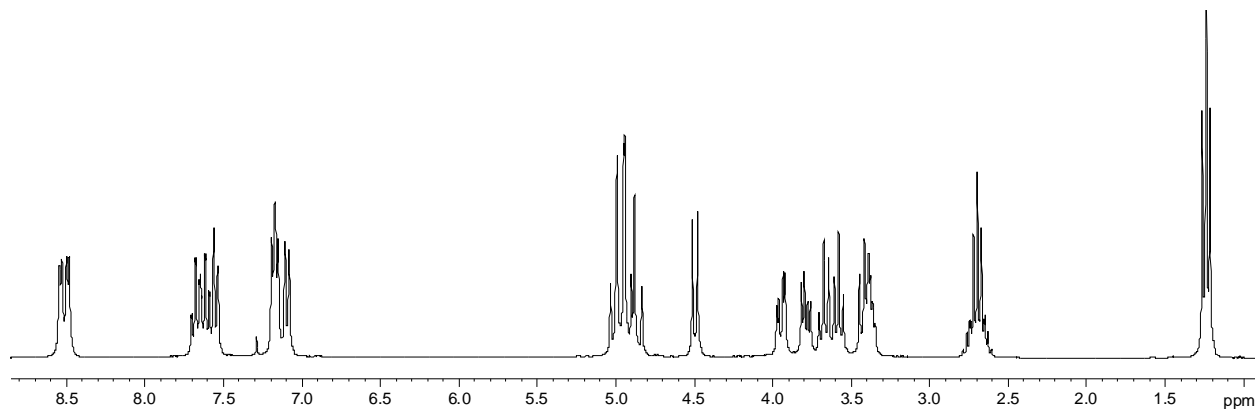

CDCl<sub>3</sub> 300 MHz

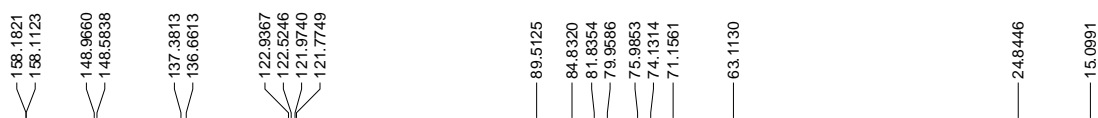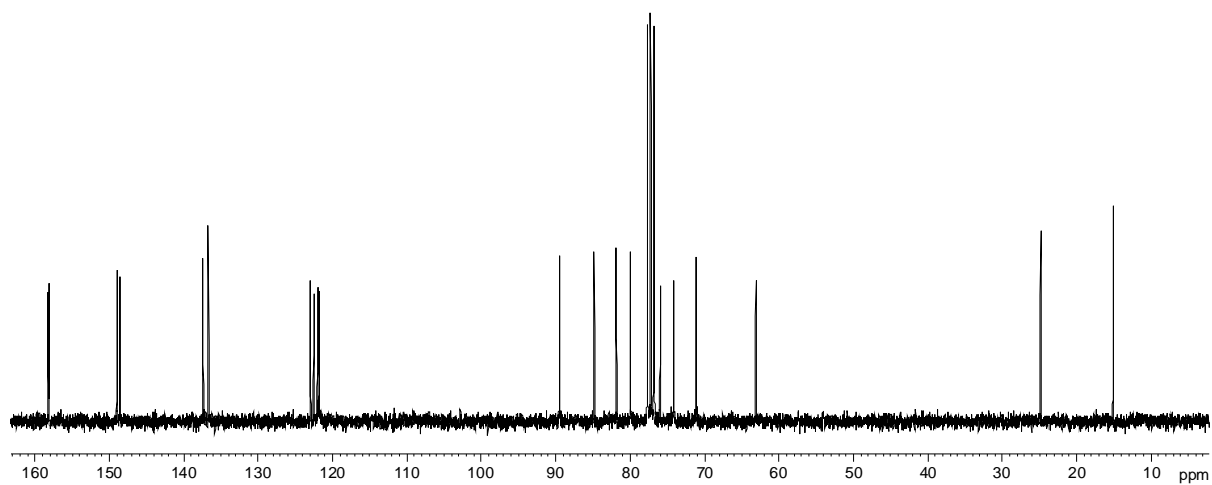

CDCl<sub>3</sub> 75 MHz

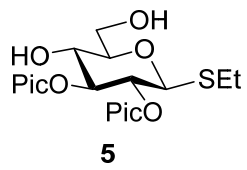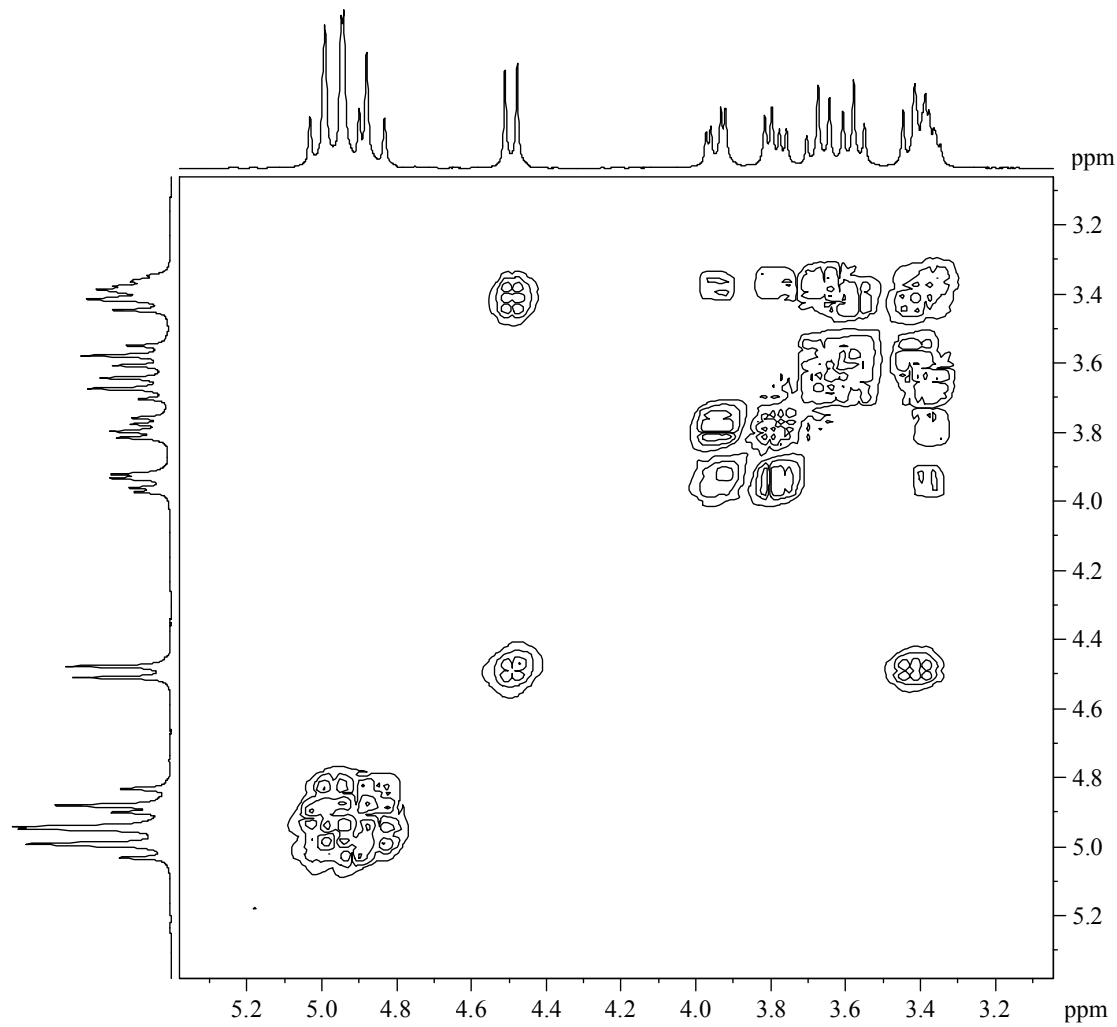

CDCl<sub>3</sub> 300 MHz

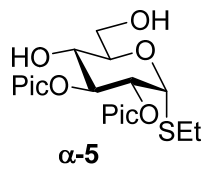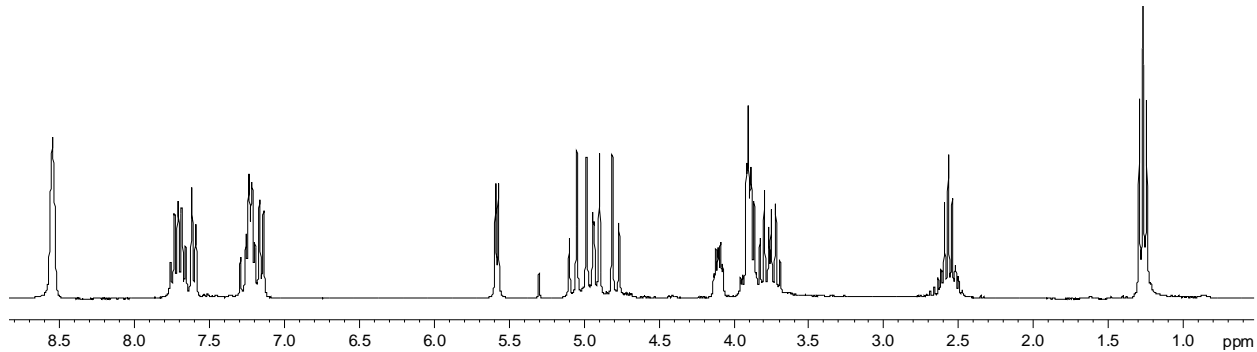

CDCl<sub>3</sub> 300 MHz

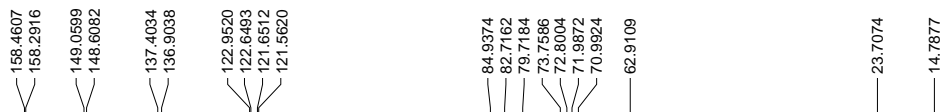

CDCl<sub>3</sub> 75 MHz

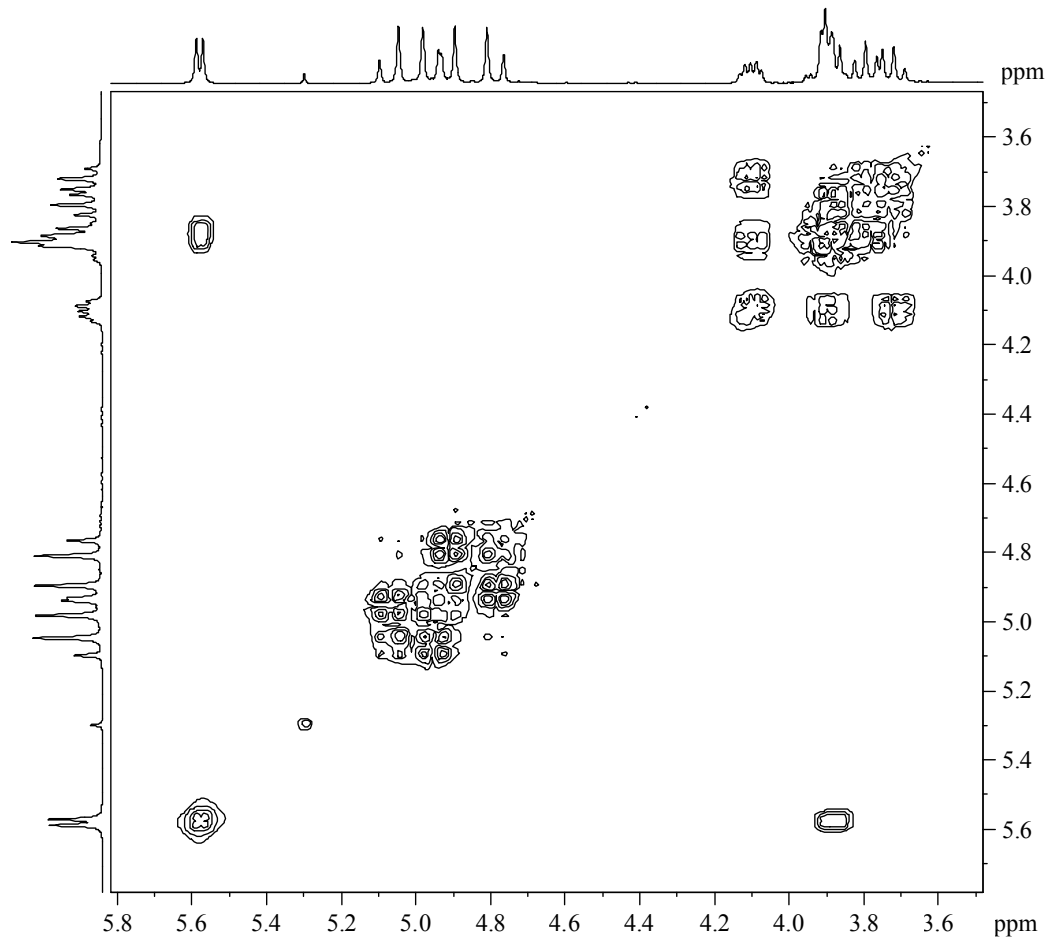

CDCl<sub>3</sub> 300 MHz

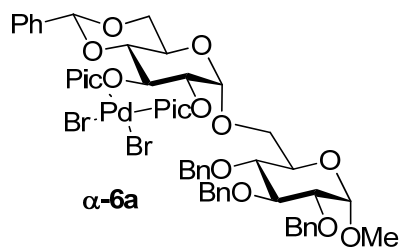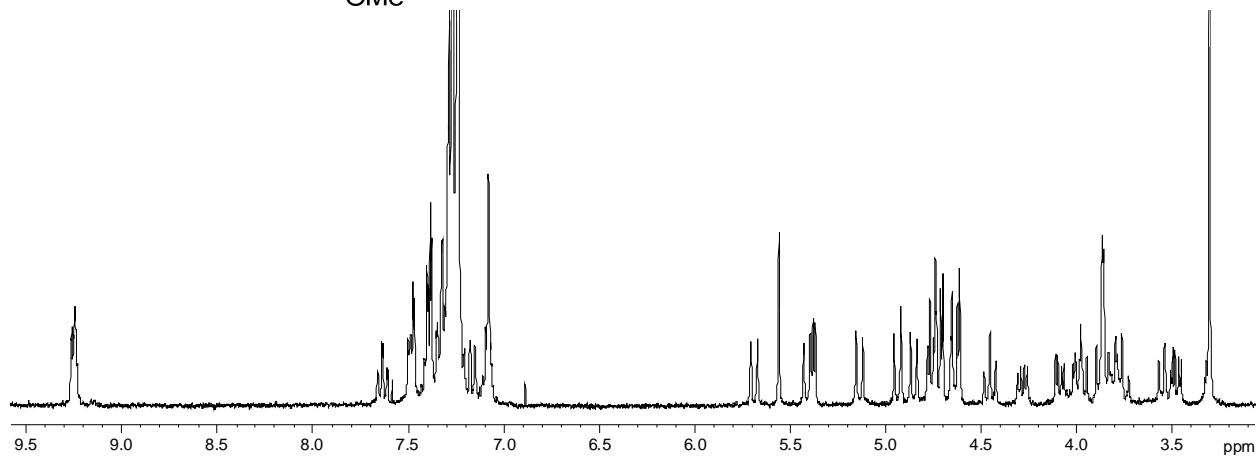

CDCl<sub>3</sub> 300 MHz

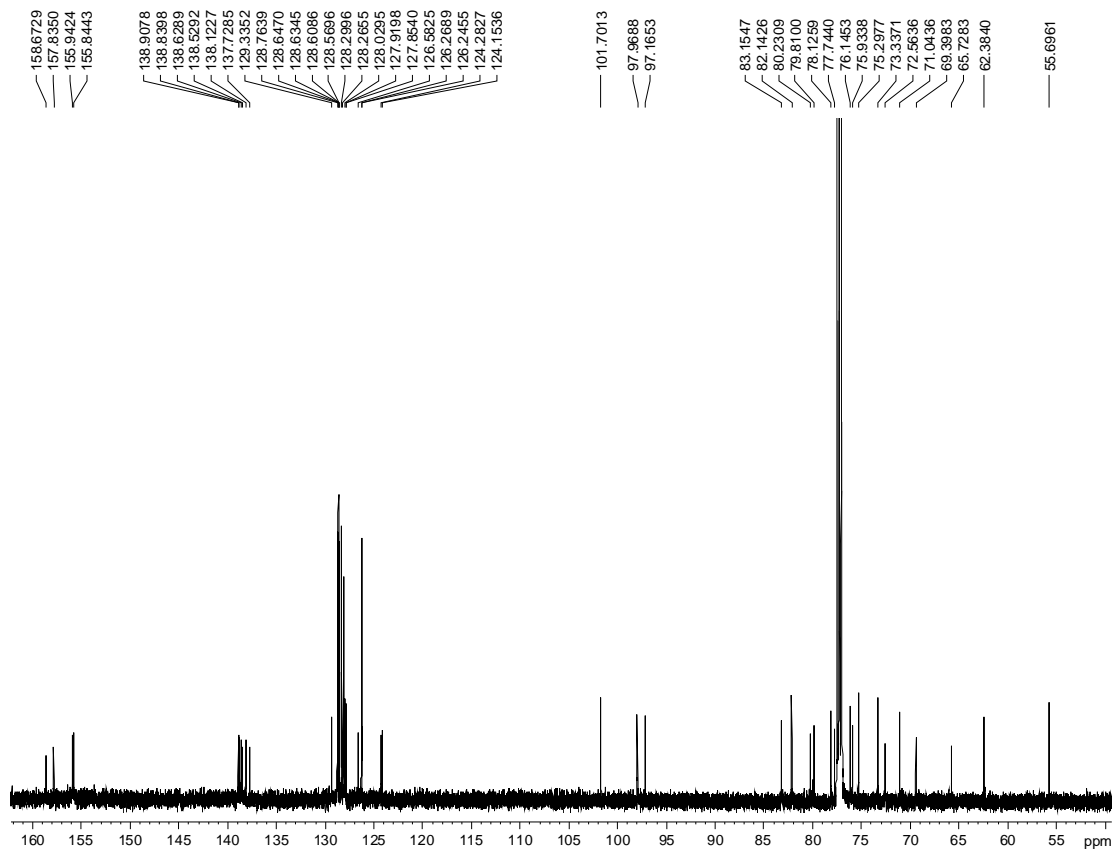

CDCl<sub>3</sub> 150 MHz



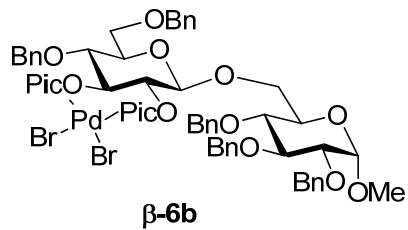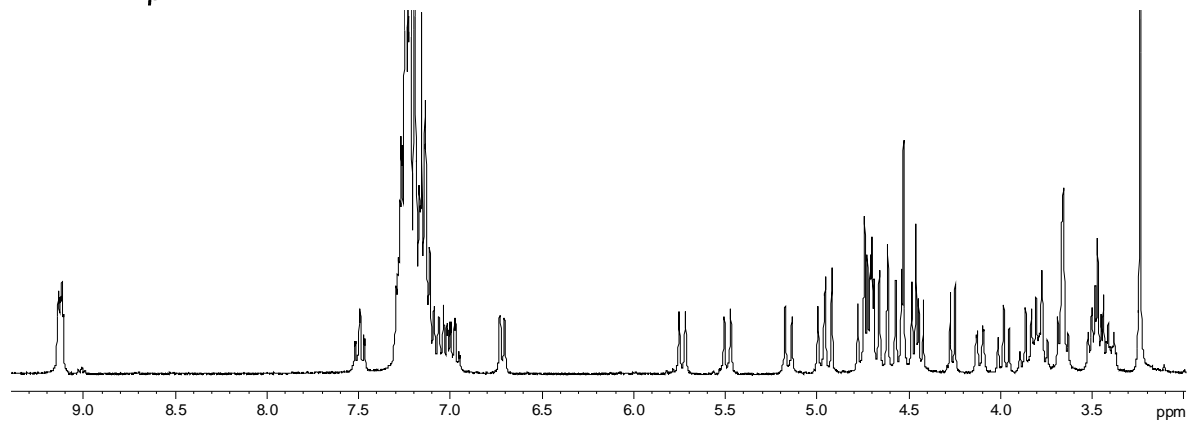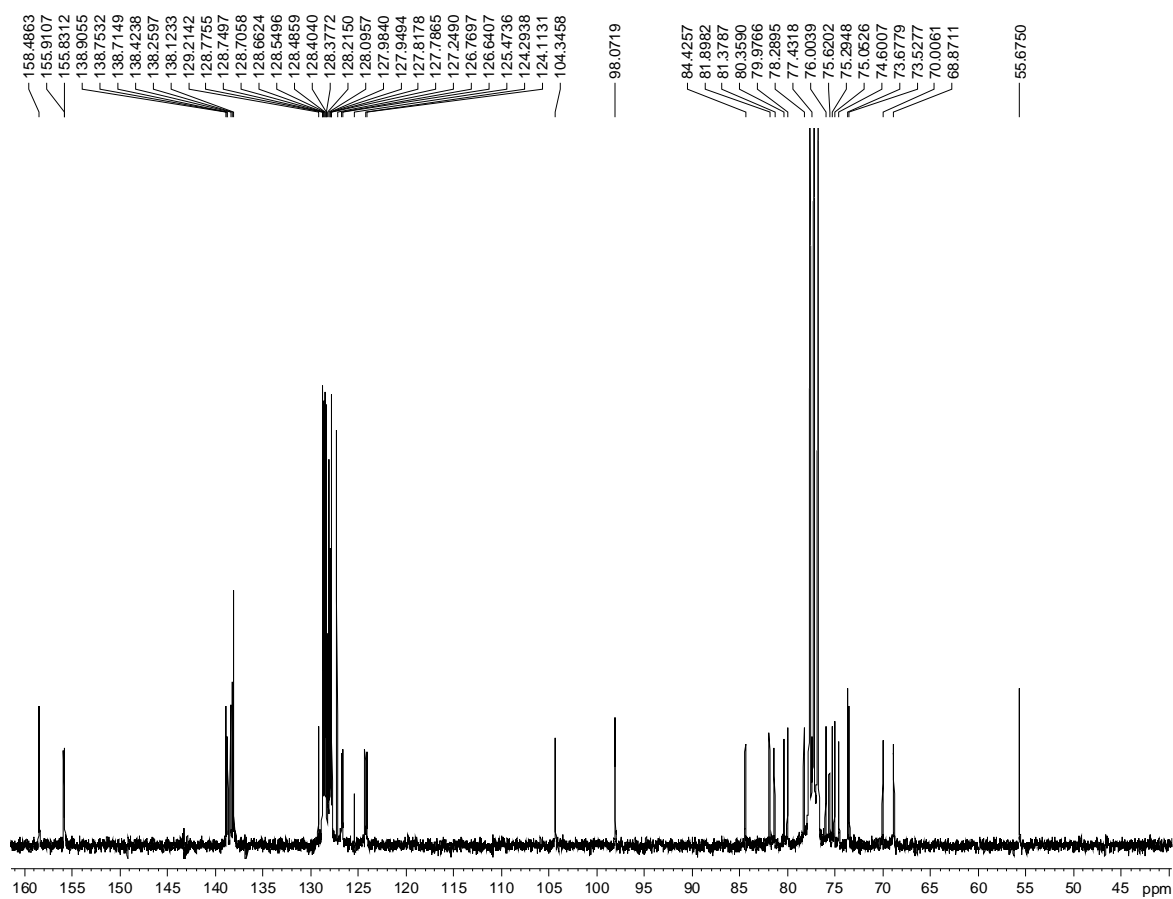





## X-Ray data

**Table 1S.** Crystal data and structure refinement for avd13811.

|                                   |                                                                                                                                                         |
|-----------------------------------|---------------------------------------------------------------------------------------------------------------------------------------------------------|
| Identification code               | d13811/lt/Ning/dipic-Pd                                                                                                                                 |
| Empirical formula                 | C <sub>27</sub> H <sub>30</sub> Br <sub>2</sub> N <sub>2</sub> O <sub>5</sub> Pd S                                                                      |
| Formula weight                    | 760.81                                                                                                                                                  |
| Temperature                       | 100(2) K                                                                                                                                                |
| Wavelength                        | 0.71073 Å                                                                                                                                               |
| Crystal system                    | Monoclinic                                                                                                                                              |
| Space group                       | P2 <sub>1</sub>                                                                                                                                         |
| Unit cell dimensions              | a = 8.3369(4) Å                      α = 90°.<br>b = 20.8048(10) Å                    β = 112.222(3)°.<br>c = 8.5721(4) Å                      γ = 90°. |
| Volume                            | 1376.38(12) Å <sup>3</sup>                                                                                                                              |
| Z                                 | 2                                                                                                                                                       |
| Density (calculated)              | 1.836 Mg/m <sup>3</sup>                                                                                                                                 |
| Absorption coefficient            | 3.694 mm <sup>-1</sup>                                                                                                                                  |
| F(000)                            | 756                                                                                                                                                     |
| Crystal size                      | 0.266 x 0.179 x 0.157 mm <sup>3</sup>                                                                                                                   |
| Theta range for data collection   | 1.958 to 27.634°.                                                                                                                                       |
| Index ranges                      | -10 ≤ h ≤ 10, -26 ≤ k ≤ 27, -11 ≤ l ≤ 11                                                                                                                |
| Reflections collected             | 47319                                                                                                                                                   |
| Independent reflections           | 6319 [R(int) = 0.0407]                                                                                                                                  |
| Completeness to theta = 25.242°   | 100.0 %                                                                                                                                                 |
| Absorption correction             | Semi-empirical from equivalents                                                                                                                         |
| Max. and min. transmission        | 0.4305 and 0.3967                                                                                                                                       |
| Refinement method                 | Full-matrix least-squares on F <sup>2</sup>                                                                                                             |
| Data / restraints / parameters    | 6319 / 151 / 363                                                                                                                                        |
| Goodness-of-fit on F <sup>2</sup> | 1.025                                                                                                                                                   |
| Final R indices [I > 2σ(I)]       | R1 = 0.0262, wR2 = 0.0574                                                                                                                               |
| R indices (all data)              | R1 = 0.0308, wR2 = 0.0592                                                                                                                               |
| Absolute structure parameter      | -0.002(4)                                                                                                                                               |
| Extinction coefficient            | n/a                                                                                                                                                     |
| Largest diff. peak and hole       | 0.553 and -0.457 e.Å <sup>-3</sup>                                                                                                                      |

**Table 2S.** Atomic coordinates ( $\times 10^4$ ) and equivalent isotropic displacement parameters ( $\text{\AA}^2 \times 10^3$ ) for avd13811.  $U(\text{eq})$  is defined as one third of the trace of the orthogonalized  $U^{ij}$  tensor.

|       | x        | y        | z         | $U(\text{eq})$ |
|-------|----------|----------|-----------|----------------|
| Pd(1) | 6432(1)  | 2268(1)  | 9362(1)   | 21(1)          |
| Br(1) | 8669(1)  | 2997(1)  | 9215(1)   | 28(1)          |
| Br(2) | 3983(1)  | 1654(1)  | 9479(1)   | 34(1)          |
| S(1)  | 12357(1) | 329(1)   | 12879(1)  | 21(1)          |
| O(1)  | 11398(4) | -164(2)  | 9872(4)   | 22(1)          |
| O(2)  | 9658(4)  | -880(2)  | 5743(4)   | 31(1)          |
| O(3)  | 8135(4)  | 69(2)    | 5664(4)   | 22(1)          |
| O(4)  | 7779(4)  | 1256(2)  | 7422(4)   | 24(1)          |
| C(1)  | 10675(6) | 199(2)   | 10858(6)  | 20(1)          |
| C(2)  | 9934(7)  | 823(2)   | 9959(6)   | 24(1)          |
| C(3)  | 8482(6)  | 672(2)   | 8241(6)   | 21(1)          |
| C(4)  | 9323(6)  | 262(2)   | 7286(5)   | 22(1)          |
| C(5)  | 10082(6) | -338(2)  | 8312(6)   | 22(1)          |
| C(6)  | 10921(6) | -756(3)  | 7385(6)   | 31(1)          |
| C(7)  | 9026(6)  | -308(3)  | 4868(6)   | 28(1)          |
| C(8)  | 7815(6)  | -479(3)  | 3106(6)   | 30(1)          |
| C(9)  | 8099(7)  | -1051(3) | 2397(6)   | 29(1)          |
| C(10) | 7060(8)  | -1205(3) | 747(7)    | 36(1)          |
| C(11) | 5762(7)  | -793(3)  | -190(7)   | 39(2)          |
| C(12) | 5484(7)  | -223(4)  | 499(7)    | 53(2)          |
| C(13) | 6519(7)  | -68(4)   | 2164(7)   | 49(2)          |
| C(14) | 5965(6)  | 1199(2)  | 6421(6)   | 24(1)          |
| N(1)  | 5229(4)  | 2313(1)  | 6849(3)   | 24(1)          |
| C(15) | 5186(5)  | 1823(1)  | 5734(4)   | 27(1)          |
| C(16) | 4252(6)  | 1902(2)  | 4017(3)   | 46(2)          |
| C(17) | 3360(6)  | 2471(2)  | 3416(3)   | 68(3)          |
| C(18) | 3403(6)  | 2962(1)  | 4532(4)   | 50(2)          |
| C(19) | 4337(5)  | 2883(1)  | 6249(4)   | 34(1)          |
| N(2)  | 7689(9)  | 2300(4)  | 11909(7)  | 19(3)          |
| C(20) | 6902(8)  | 2668(4)  | 12774(10) | 19(1)          |
| C(21) | 7633(9)  | 2701(4)  | 14523(10) | 19(1)          |

|        |           |         |           |       |
|--------|-----------|---------|-----------|-------|
| C(22)  | 9150(9)   | 2367(4) | 15407(7)  | 21(3) |
| C(23)  | 9937(8)   | 2000(4) | 14542(7)  | 22(2) |
| C(24)  | 9206(9)   | 1966(3) | 12793(7)  | 18(2) |
| C(25)  | 10060(11) | 1645(5) | 11813(12) | 18(2) |
| O(5)   | 8981(10)  | 1126(4) | 10877(9)  | 17(2) |
| N(2')  | 7479(9)   | 2227(4) | 11891(7)  | 19(3) |
| C(20') | 7391(10)  | 2777(3) | 12777(11) | 19(1) |
| C(21') | 8234(11)  | 2795(3) | 14519(11) | 19(1) |
| C(22') | 9166(10)  | 2264(4) | 15376(7)  | 29(4) |
| C(23') | 9254(10)  | 1715(4) | 14490(7)  | 24(2) |
| C(24') | 8410(10)  | 1696(3) | 12747(7)  | 20(2) |
| C(25') | 8497(12)  | 1147(5) | 11711(13) | 22(2) |
| O(5')  | 9649(12)  | 1330(4) | 10963(10) | 21(2) |
| C(26)  | 12828(7)  | -503(2) | 13501(7)  | 26(1) |
| C(27)  | 14190(6)  | -533(2) | 15252(6)  | 24(1) |

---

**Table 3S.** Bond lengths [Å] and angles [°] for avd13811.

---

|             |           |
|-------------|-----------|
| Pd(1)-N(1)  | 2.005(2)  |
| Pd(1)-N(2') | 2.010(6)  |
| Pd(1)-N(2)  | 2.035(5)  |
| Pd(1)-Br(2) | 2.4426(6) |
| Pd(1)-Br(1) | 2.4432(6) |
| S(1)-C(1)   | 1.790(5)  |
| S(1)-C(26)  | 1.809(5)  |
| O(1)-C(5)   | 1.419(5)  |
| O(1)-C(1)   | 1.426(5)  |
| O(2)-C(7)   | 1.401(7)  |
| O(2)-C(6)   | 1.426(6)  |
| O(3)-C(7)   | 1.420(6)  |
| O(3)-C(4)   | 1.427(5)  |
| O(4)-C(3)   | 1.415(6)  |
| O(4)-C(14)  | 1.434(6)  |
| C(1)-C(2)   | 1.518(7)  |
| C(1)-H(1)   | 1.0000    |
| C(2)-O(5')  | 1.436(9)  |
| C(2)-O(5)   | 1.456(8)  |
| C(2)-C(3)   | 1.544(6)  |
| C(2)-H(2)   | 1.0000    |
| C(3)-C(4)   | 1.523(6)  |
| C(3)-H(3)   | 1.0000    |
| C(4)-C(5)   | 1.521(7)  |
| C(4)-H(4)   | 1.0000    |
| C(5)-C(6)   | 1.516(7)  |
| C(5)-H(5)   | 1.0000    |
| C(6)-H(6A)  | 0.9900    |
| C(6)-H(6B)  | 0.9900    |
| C(7)-C(8)   | 1.508(6)  |
| C(7)-H(7)   | 1.0000    |
| C(8)-C(13)  | 1.375(9)  |
| C(8)-C(9)   | 1.397(8)  |
| C(9)-C(10)  | 1.388(7)  |

|              |           |
|--------------|-----------|
| C(9)-H(9)    | 0.9500    |
| C(10)-C(11)  | 1.376(9)  |
| C(10)-H(10)  | 0.9500    |
| C(11)-C(12)  | 1.383(9)  |
| C(11)-H(11)  | 0.9500    |
| C(12)-C(13)  | 1.398(8)  |
| C(12)-H(12)  | 0.9500    |
| C(13)-H(13)  | 0.9500    |
| C(14)-C(15)  | 1.470(5)  |
| C(14)-H(14A) | 0.9900    |
| C(14)-H(14B) | 0.9900    |
| N(1)-C(15)   | 1.3900    |
| N(1)-C(19)   | 1.3900    |
| C(15)-C(16)  | 1.3900    |
| C(16)-C(17)  | 1.3900    |
| C(16)-H(16)  | 0.9500    |
| C(17)-C(18)  | 1.3900    |
| C(17)-H(17)  | 0.9500    |
| C(18)-C(19)  | 1.3900    |
| C(18)-H(18)  | 0.9500    |
| C(19)-H(19)  | 0.9500    |
| N(2)-C(20)   | 1.3900    |
| N(2)-C(24)   | 1.3900    |
| C(20)-C(21)  | 1.3900    |
| C(20)-H(20)  | 0.9500    |
| C(21)-C(22)  | 1.3900    |
| C(21)-H(21)  | 0.9500    |
| C(22)-C(23)  | 1.3900    |
| C(22)-H(22)  | 0.9500    |
| C(23)-C(24)  | 1.3900    |
| C(23)-H(23)  | 0.9500    |
| C(24)-C(25)  | 1.453(10) |
| C(25)-O(5)   | 1.439(12) |
| C(25)-H(25A) | 0.9900    |
| C(25)-H(25B) | 0.9900    |
| N(2')-C(20') | 1.3900    |

|                   |           |
|-------------------|-----------|
| N(2')-C(24')      | 1.3900    |
| C(20')-C(21')     | 1.3900    |
| C(20')-H(20')     | 0.9500    |
| C(21')-C(22')     | 1.3900    |
| C(21')-H(21')     | 0.9500    |
| C(22')-C(23')     | 1.3900    |
| C(22')-H(22')     | 0.9500    |
| C(23')-C(24')     | 1.3900    |
| C(23')-H(23')     | 0.9500    |
| C(24')-C(25')     | 1.466(11) |
| C(25')-O(5')      | 1.394(12) |
| C(25')-H(25C)     | 0.9900    |
| C(25')-H(25D)     | 0.9900    |
| C(26)-C(27)       | 1.503(7)  |
| C(26)-H(26A)      | 0.9900    |
| C(26)-H(26B)      | 0.9900    |
| C(27)-H(27A)      | 0.9800    |
| C(27)-H(27B)      | 0.9800    |
| C(27)-H(27C)      | 0.9800    |
|                   |           |
| N(1)-Pd(1)-N(2')  | 176.1(2)  |
| N(1)-Pd(1)-N(2)   | 175.4(2)  |
| N(1)-Pd(1)-Br(2)  | 88.98(10) |
| N(2')-Pd(1)-Br(2) | 87.8(2)   |
| N(2)-Pd(1)-Br(2)  | 94.1(2)   |
| N(1)-Pd(1)-Br(1)  | 89.85(9)  |
| N(2')-Pd(1)-Br(1) | 93.1(2)   |
| N(2)-Pd(1)-Br(1)  | 86.7(2)   |
| Br(2)-Pd(1)-Br(1) | 173.19(2) |
| C(1)-S(1)-C(26)   | 98.3(2)   |
| C(5)-O(1)-C(1)    | 110.2(3)  |
| C(7)-O(2)-C(6)    | 111.2(4)  |
| C(7)-O(3)-C(4)    | 109.1(3)  |
| C(3)-O(4)-C(14)   | 111.8(3)  |
| O(1)-C(1)-C(2)    | 109.5(4)  |
| O(1)-C(1)-S(1)    | 107.6(3)  |

|                  |          |
|------------------|----------|
| C(2)-C(1)-S(1)   | 112.4(3) |
| O(1)-C(1)-H(1)   | 109.1    |
| C(2)-C(1)-H(1)   | 109.1    |
| S(1)-C(1)-H(1)   | 109.1    |
| O(5')-C(2)-C(1)  | 116.8(5) |
| O(5)-C(2)-C(1)   | 107.3(5) |
| O(5')-C(2)-C(3)  | 118.3(5) |
| O(5)-C(2)-C(3)   | 102.3(5) |
| C(1)-C(2)-C(3)   | 109.4(4) |
| O(5)-C(2)-H(2)   | 112.4    |
| C(1)-C(2)-H(2)   | 112.4    |
| C(3)-C(2)-H(2)   | 112.4    |
| O(4)-C(3)-C(4)   | 113.8(4) |
| O(4)-C(3)-C(2)   | 109.0(4) |
| C(4)-C(3)-C(2)   | 105.8(4) |
| O(4)-C(3)-H(3)   | 109.4    |
| C(4)-C(3)-H(3)   | 109.4    |
| C(2)-C(3)-H(3)   | 109.4    |
| O(3)-C(4)-C(5)   | 108.4(4) |
| O(3)-C(4)-C(3)   | 113.0(4) |
| C(5)-C(4)-C(3)   | 108.9(4) |
| O(3)-C(4)-H(4)   | 108.8    |
| C(5)-C(4)-H(4)   | 108.8    |
| C(3)-C(4)-H(4)   | 108.8    |
| O(1)-C(5)-C(6)   | 107.2(4) |
| O(1)-C(5)-C(4)   | 109.8(4) |
| C(6)-C(5)-C(4)   | 110.0(4) |
| O(1)-C(5)-H(5)   | 110.0    |
| C(6)-C(5)-H(5)   | 110.0    |
| C(4)-C(5)-H(5)   | 110.0    |
| O(2)-C(6)-C(5)   | 107.8(4) |
| O(2)-C(6)-H(6A)  | 110.1    |
| C(5)-C(6)-H(6A)  | 110.1    |
| O(2)-C(6)-H(6B)  | 110.1    |
| C(5)-C(6)-H(6B)  | 110.1    |
| H(6A)-C(6)-H(6B) | 108.5    |



|                     |            |
|---------------------|------------|
| O(2)-C(7)-O(3)      | 111.8(4)   |
| O(2)-C(7)-C(8)      | 108.1(4)   |
| O(3)-C(7)-C(8)      | 109.7(4)   |
| O(2)-C(7)-H(7)      | 109.1      |
| O(3)-C(7)-H(7)      | 109.1      |
| C(8)-C(7)-H(7)      | 109.1      |
| C(13)-C(8)-C(9)     | 120.0(5)   |
| C(13)-C(8)-C(7)     | 121.4(5)   |
| C(9)-C(8)-C(7)      | 118.5(5)   |
| C(10)-C(9)-C(8)     | 119.8(5)   |
| C(10)-C(9)-H(9)     | 120.1      |
| C(8)-C(9)-H(9)      | 120.1      |
| C(11)-C(10)-C(9)    | 120.0(6)   |
| C(11)-C(10)-H(10)   | 120.0      |
| C(9)-C(10)-H(10)    | 120.0      |
| C(10)-C(11)-C(12)   | 120.5(5)   |
| C(10)-C(11)-H(11)   | 119.8      |
| C(12)-C(11)-H(11)   | 119.8      |
| C(11)-C(12)-C(13)   | 119.7(6)   |
| C(11)-C(12)-H(12)   | 120.1      |
| C(13)-C(12)-H(12)   | 120.1      |
| C(8)-C(13)-C(12)    | 120.0(6)   |
| C(8)-C(13)-H(13)    | 120.0      |
| C(12)-C(13)-H(13)   | 120.0      |
| O(4)-C(14)-C(15)    | 111.9(4)   |
| O(4)-C(14)-H(14A)   | 109.2      |
| C(15)-C(14)-H(14A)  | 109.2      |
| O(4)-C(14)-H(14B)   | 109.2      |
| C(15)-C(14)-H(14B)  | 109.2      |
| H(14A)-C(14)-H(14B) | 107.9      |
| C(15)-N(1)-C(19)    | 120.0      |
| C(15)-N(1)-Pd(1)    | 125.26(16) |
| C(19)-N(1)-Pd(1)    | 114.70(16) |
| N(1)-C(15)-C(16)    | 120.0      |
| N(1)-C(15)-C(14)    | 118.6(3)   |
| C(16)-C(15)-C(14)   | 121.0(3)   |

|                     |          |
|---------------------|----------|
| C(15)-C(16)-C(17)   | 120.0    |
| C(15)-C(16)-H(16)   | 120.0    |
| C(17)-C(16)-H(16)   | 120.0    |
| C(18)-C(17)-C(16)   | 120.0    |
| C(18)-C(17)-H(17)   | 120.0    |
| C(16)-C(17)-H(17)   | 120.0    |
| C(17)-C(18)-C(19)   | 120.0    |
| C(17)-C(18)-H(18)   | 120.0    |
| C(19)-C(18)-H(18)   | 120.0    |
| C(18)-C(19)-N(1)    | 120.0    |
| C(18)-C(19)-H(19)   | 120.0    |
| N(1)-C(19)-H(19)    | 120.0    |
| C(20)-N(2)-C(24)    | 120.0    |
| C(20)-N(2)-Pd(1)    | 115.8(4) |
| C(24)-N(2)-Pd(1)    | 124.2(4) |
| N(2)-C(20)-C(21)    | 120.0    |
| N(2)-C(20)-H(20)    | 120.0    |
| C(21)-C(20)-H(20)   | 120.0    |
| C(22)-C(21)-C(20)   | 120.0    |
| C(22)-C(21)-H(21)   | 120.0    |
| C(20)-C(21)-H(21)   | 120.0    |
| C(23)-C(22)-C(21)   | 120.0    |
| C(23)-C(22)-H(22)   | 120.0    |
| C(21)-C(22)-H(22)   | 120.0    |
| C(22)-C(23)-C(24)   | 120.0    |
| C(22)-C(23)-H(23)   | 120.0    |
| C(24)-C(23)-H(23)   | 120.0    |
| C(23)-C(24)-N(2)    | 120.0    |
| C(23)-C(24)-C(25)   | 122.4(5) |
| N(2)-C(24)-C(25)    | 117.3(5) |
| O(5)-C(25)-C(24)    | 109.1(7) |
| O(5)-C(25)-H(25A)   | 109.9    |
| C(24)-C(25)-H(25A)  | 109.9    |
| O(5)-C(25)-H(25B)   | 109.9    |
| C(24)-C(25)-H(25B)  | 109.9    |
| H(25A)-C(25)-H(25B) | 108.3    |

|                      |          |
|----------------------|----------|
| C(25)-O(5)-C(2)      | 105.8(7) |
| C(20')-N(2')-C(24')  | 120.0    |
| C(20')-N(2')-Pd(1)   | 117.6(4) |
| C(24')-N(2')-Pd(1)   | 122.1(4) |
| C(21')-C(20')-N(2')  | 120.0    |
| C(21')-C(20')-H(20') | 120.0    |
| N(2')-C(20')-H(20')  | 120.0    |
| C(22')-C(21')-C(20') | 120.0    |
| C(22')-C(21')-H(21') | 120.0    |
| C(20')-C(21')-H(21') | 120.0    |
| C(21')-C(22')-C(23') | 120.0    |
| C(21')-C(22')-H(22') | 120.0    |
| C(23')-C(22')-H(22') | 120.0    |
| C(24')-C(23')-C(22') | 120.0    |
| C(24')-C(23')-H(23') | 120.0    |
| C(22')-C(23')-H(23') | 120.0    |
| C(23')-C(24')-N(2')  | 120.0    |
| C(23')-C(24')-C(25') | 123.5(6) |
| N(2')-C(24')-C(25')  | 116.5(6) |
| O(5')-C(25')-C(24')  | 105.5(8) |
| O(5')-C(25')-H(25C)  | 110.6    |
| C(24')-C(25')-H(25C) | 110.6    |
| O(5')-C(25')-H(25D)  | 110.6    |
| C(24')-C(25')-H(25D) | 110.6    |
| H(25C)-C(25')-H(25D) | 108.8    |
| C(25')-O(5')-C(2)    | 112.0(8) |
| C(27)-C(26)-S(1)     | 109.4(3) |
| C(27)-C(26)-H(26A)   | 109.8    |
| S(1)-C(26)-H(26A)    | 109.8    |
| C(27)-C(26)-H(26B)   | 109.8    |
| S(1)-C(26)-H(26B)    | 109.8    |
| H(26A)-C(26)-H(26B)  | 108.2    |
| C(26)-C(27)-H(27A)   | 109.5    |
| C(26)-C(27)-H(27B)   | 109.5    |
| H(27A)-C(27)-H(27B)  | 109.5    |
| C(26)-C(27)-H(27C)   | 109.5    |

H(27A)-C(27)-H(27C)      109.5  
H(27B)-C(27)-H(27C)      109.5

**Table 4S.** Anisotropic displacement parameters ( $\text{\AA}^2 \times 10^3$ ) for avd13811. The anisotropic displacement factor exponent takes the form:  $-2\pi^2 [ h^2 a^{*2} U^{11} + \dots + 2 h k a^* b^* U^{12} ]$

|       | U <sup>11</sup> | U <sup>22</sup> | U <sup>33</sup> | U <sup>23</sup> | U <sup>13</sup> | U <sup>12</sup> |
|-------|-----------------|-----------------|-----------------|-----------------|-----------------|-----------------|
| Pd(1) | 29(1)           | 17(1)           | 15(1)           | 1(1)            | 7(1)            | 0(1)            |
| Br(1) | 40(1)           | 18(1)           | 23(1)           | -3(1)           | 8(1)            | -8(1)           |
| Br(2) | 28(1)           | 44(1)           | 31(1)           | 9(1)            | 13(1)           | 0(1)            |
| S(1)  | 22(1)           | 21(1)           | 16(1)           | -2(1)           | 5(1)            | -2(1)           |
| O(1)  | 19(2)           | 32(2)           | 14(2)           | -9(1)           | 5(1)            | 0(1)            |
| O(2)  | 25(2)           | 47(2)           | 18(2)           | -12(2)          | 4(1)            | 5(2)            |
| O(3)  | 17(2)           | 35(2)           | 13(2)           | -7(1)           | 5(1)            | -6(1)           |
| O(4)  | 24(2)           | 25(2)           | 18(2)           | 2(1)            | 4(1)            | -7(1)           |
| C(1)  | 18(2)           | 28(2)           | 14(2)           | -3(2)           | 8(2)            | -1(2)           |
| C(2)  | 28(2)           | 29(3)           | 13(2)           | -5(2)           | 7(2)            | 2(2)            |
| C(3)  | 21(2)           | 27(2)           | 14(2)           | 0(2)            | 7(2)            | -7(2)           |
| C(4)  | 17(2)           | 36(3)           | 12(2)           | -4(2)           | 4(2)            | -7(2)           |
| C(5)  | 17(2)           | 32(3)           | 19(2)           | -6(2)           | 7(2)            | -1(2)           |
| C(6)  | 21(2)           | 54(4)           | 17(2)           | -13(2)          | 7(2)            | 3(2)            |
| C(7)  | 18(2)           | 51(3)           | 15(2)           | -10(2)          | 8(2)            | -6(2)           |
| C(8)  | 18(2)           | 59(4)           | 14(2)           | -13(2)          | 9(2)            | -12(2)          |
| C(9)  | 30(3)           | 39(3)           | 19(2)           | -1(2)           | 9(2)            | -12(2)          |
| C(10) | 43(3)           | 45(3)           | 20(3)           | -9(2)           | 14(2)           | -19(3)          |
| C(11) | 24(3)           | 78(5)           | 14(2)           | -13(3)          | 3(2)            | -13(3)          |
| C(12) | 20(3)           | 109(6)          | 22(3)           | -21(3)          | -2(2)           | 15(3)           |
| C(13) | 18(3)           | 94(5)           | 29(3)           | -28(3)          | 4(2)            | 15(3)           |
| C(14) | 27(2)           | 17(2)           | 22(2)           | -1(2)           | 3(2)            | -4(2)           |
| N(1)  | 32(2)           | 14(2)           | 21(2)           | 4(2)            | 5(2)            | 0(2)            |
| C(15) | 37(3)           | 18(2)           | 19(2)           | 0(2)            | 3(2)            | -6(2)           |
| C(16) | 86(5)           | 18(3)           | 19(3)           | 1(2)            | 1(3)            | 0(3)            |
| C(17) | 129(7)          | 20(3)           | 20(3)           | 5(2)            | -12(3)          | 9(3)            |
| C(18) | 82(5)           | 19(3)           | 29(3)           | 7(2)            | -3(3)           | 8(3)            |

|        |       |       |       |       |       |        |
|--------|-------|-------|-------|-------|-------|--------|
| C(19)  | 47(3) | 20(3) | 27(3) | 7(2)  | 3(2)  | 3(2)   |
| N(2)   | 23(4) | 17(5) | 18(5) | -4(4) | 9(4)  | -6(4)  |
| C(20)  | 23(4) | 17(2) | 24(2) | -5(2) | 14(3) | -12(2) |
| C(21)  | 23(4) | 17(2) | 24(2) | -5(2) | 14(3) | -12(2) |
| C(22)  | 30(7) | 20(5) | 19(6) | -7(4) | 16(5) | -13(4) |
| C(23)  | 29(5) | 22(5) | 14(4) | -2(3) | 6(3)  | -3(4)  |
| C(24)  | 25(4) | 15(4) | 18(4) | -2(3) | 11(3) | -6(3)  |
| C(25)  | 18(4) | 15(4) | 17(4) | -4(4) | 4(3)  | -6(3)  |
| O(5)   | 17(4) | 23(4) | 18(4) | -7(3) | 12(3) | -7(3)  |
| N(2')  | 23(5) | 21(5) | 14(5) | 0(3)  | 8(4)  | -3(4)  |
| C(20') | 23(4) | 17(2) | 24(2) | -5(2) | 14(3) | -12(2) |
| C(21') | 23(4) | 17(2) | 24(2) | -5(2) | 14(3) | -12(2) |
| C(22') | 33(8) | 33(6) | 20(6) | -2(4) | 10(5) | -4(5)  |
| C(23') | 30(5) | 29(5) | 14(4) | 2(3)  | 10(4) | -1(4)  |
| C(24') | 26(5) | 24(4) | 15(4) | 0(3)  | 13(3) | -5(4)  |
| C(25') | 21(4) | 23(5) | 19(4) | 0(3)  | 6(4)  | -4(3)  |
| O(5')  | 25(5) | 22(5) | 17(4) | 0(3)  | 10(4) | -4(3)  |
| C(26)  | 28(3) | 19(2) | 29(3) | -3(2) | 7(2)  | 2(2)   |
| C(27)  | 25(2) | 19(2) | 26(3) | 1(2)  | 8(2)  | -1(2)  |

**Table 5S.** Hydrogen coordinates ( $\times 10^4$ ) and isotropic displacement parameters ( $\text{\AA}^2 \times 10^{-3}$ ) for avd13811.

|       | x     | y     | z     | U(eq) |
|-------|-------|-------|-------|-------|
| H(1)  | 9724  | -56   | 11005 | 24    |
| H(2)  | 10846 | 1111  | 9849  | 28    |
| H(3)  | 7551  | 418   | 8426  | 25    |
| H(4)  | 10282 | 514   | 7147  | 26    |
| H(5)  | 9150  | -585  | 8516  | 27    |
| H(6A) | 11933 | -532  | 7300  | 37    |
| H(6B) | 11324 | -1165 | 8000  | 37    |
| H(7)  | 10018 | -54   | 4807  | 33    |
| H(9)  | 9002  | -1333 | 3041  | 35    |

|        |       |       |       |    |
|--------|-------|-------|-------|----|
| H(10)  | 7245  | -1595 | 264   | 43 |
| H(11)  | 5052  | -901  | -1317 | 47 |
| H(12)  | 4592  | 61    | -156  | 64 |
| H(13)  | 6328  | 322   | 2645  | 58 |
| H(14A) | 5364  | 1019  | 7122  | 28 |
| H(14B) | 5801  | 897   | 5481  | 28 |
| H(16)  | 4223  | 1566  | 3254  | 56 |
| H(17)  | 2722  | 2525  | 2243  | 82 |
| H(18)  | 2793  | 3351  | 4121  | 60 |
| H(19)  | 4366  | 3218  | 7011  | 41 |
| H(20)  | 5865  | 2896  | 12170 | 23 |
| H(21)  | 7095  | 2952  | 15114 | 23 |
| H(22)  | 9650  | 2390  | 16602 | 25 |
| H(23)  | 10974 | 1771  | 15146 | 26 |
| H(25A) | 10262 | 1954  | 11029 | 21 |
| H(25B) | 11196 | 1475  | 12574 | 21 |
| H(20') | 6754  | 3140  | 12192 | 23 |
| H(21') | 8174  | 3171  | 15125 | 23 |
| H(22') | 9743  | 2277  | 16566 | 35 |
| H(23') | 9891  | 1352  | 15075 | 29 |
| H(25C) | 8924  | 760   | 12417 | 26 |
| H(25D) | 7340  | 1053  | 10842 | 26 |
| H(26A) | 11762 | -721  | 13471 | 32 |
| H(26B) | 13246 | -725  | 12706 | 32 |
| H(27A) | 15285 | -364  | 15247 | 35 |
| H(27B) | 14352 | -980  | 15640 | 35 |
| H(27C) | 13821 | -274  | 16013 | 35 |

---

**Table 6.** Torsion angles [°] for avd13811.

---

|                      |           |
|----------------------|-----------|
| C(5)-O(1)-C(1)-C(2)  | -63.4(5)  |
| C(5)-O(1)-C(1)-S(1)  | 174.1(3)  |
| C(26)-S(1)-C(1)-O(1) | -60.2(3)  |
| C(26)-S(1)-C(1)-C(2) | 179.1(3)  |
| O(1)-C(1)-C(2)-O(5') | -161.1(6) |
| S(1)-C(1)-C(2)-O(5') | -41.6(7)  |
| O(1)-C(1)-C(2)-O(5)  | 171.3(5)  |
| S(1)-C(1)-C(2)-O(5)  | -69.1(5)  |
| O(1)-C(1)-C(2)-C(3)  | 61.1(5)   |
| S(1)-C(1)-C(2)-C(3)  | -179.4(3) |
| C(14)-O(4)-C(3)-C(4) | 95.2(4)   |
| C(14)-O(4)-C(3)-C(2) | -146.9(4) |
| O(5')-C(2)-C(3)-O(4) | 41.9(7)   |
| O(5)-C(2)-C(3)-O(4)  | 65.6(5)   |
| C(1)-C(2)-C(3)-O(4)  | 179.1(4)  |
| O(5')-C(2)-C(3)-C(4) | 164.7(5)  |
| O(5)-C(2)-C(3)-C(4)  | -171.7(5) |
| C(1)-C(2)-C(3)-C(4)  | -58.2(5)  |
| C(7)-O(3)-C(4)-C(5)  | -59.2(4)  |
| C(7)-O(3)-C(4)-C(3)  | 179.9(4)  |
| O(4)-C(3)-C(4)-O(3)  | -61.4(5)  |
| C(2)-C(3)-C(4)-O(3)  | 179.0(4)  |
| O(4)-C(3)-C(4)-C(5)  | 178.1(4)  |
| C(2)-C(3)-C(4)-C(5)  | 58.4(5)   |
| C(1)-O(1)-C(5)-C(6)  | -176.5(4) |
| C(1)-O(1)-C(5)-C(4)  | 64.1(5)   |
| O(3)-C(4)-C(5)-O(1)  | 174.1(3)  |
| C(3)-C(4)-C(5)-O(1)  | -62.5(5)  |
| O(3)-C(4)-C(5)-C(6)  | 56.5(5)   |
| C(3)-C(4)-C(5)-C(6)  | 179.8(4)  |
| C(7)-O(2)-C(6)-C(5)  | 57.8(5)   |
| O(1)-C(5)-C(6)-O(2)  | -174.1(4) |
| C(4)-C(5)-C(6)-O(2)  | -54.8(5)  |
| C(6)-O(2)-C(7)-O(3)  | -63.7(5)  |

|                         |           |
|-------------------------|-----------|
| C(6)-O(2)-C(7)-C(8)     | 175.4(4)  |
| C(4)-O(3)-C(7)-O(2)     | 63.8(5)   |
| C(4)-O(3)-C(7)-C(8)     | -176.3(4) |
| O(2)-C(7)-C(8)-C(13)    | 155.0(5)  |
| O(3)-C(7)-C(8)-C(13)    | 32.8(7)   |
| O(2)-C(7)-C(8)-C(9)     | -29.0(6)  |
| O(3)-C(7)-C(8)-C(9)     | -151.2(4) |
| C(13)-C(8)-C(9)-C(10)   | -0.7(8)   |
| C(7)-C(8)-C(9)-C(10)    | -176.8(5) |
| C(8)-C(9)-C(10)-C(11)   | 0.5(8)    |
| C(9)-C(10)-C(11)-C(12)  | 0.1(8)    |
| C(10)-C(11)-C(12)-C(13) | -0.6(10)  |
| C(9)-C(8)-C(13)-C(12)   | 0.2(9)    |
| C(7)-C(8)-C(13)-C(12)   | 176.2(6)  |
| C(11)-C(12)-C(13)-C(8)  | 0.4(11)   |
| C(3)-O(4)-C(14)-C(15)   | 173.2(4)  |
| C(19)-N(1)-C(15)-C(16)  | 0.0       |
| Pd(1)-N(1)-C(15)-C(16)  | 177.6(3)  |
| C(19)-N(1)-C(15)-C(14)  | -172.8(4) |
| Pd(1)-N(1)-C(15)-C(14)  | 4.8(4)    |
| O(4)-C(14)-C(15)-N(1)   | -60.7(5)  |
| O(4)-C(14)-C(15)-C(16)  | 126.6(3)  |
| N(1)-C(15)-C(16)-C(17)  | 0.0       |
| C(14)-C(15)-C(16)-C(17) | 172.6(4)  |
| C(15)-C(16)-C(17)-C(18) | 0.0       |
| C(16)-C(17)-C(18)-C(19) | 0.0       |
| C(17)-C(18)-C(19)-N(1)  | 0.0       |
| C(15)-N(1)-C(19)-C(18)  | 0.0       |
| Pd(1)-N(1)-C(19)-C(18)  | -177.8(2) |
| C(24)-N(2)-C(20)-C(21)  | 0.0       |
| Pd(1)-N(2)-C(20)-C(21)  | 177.8(5)  |
| N(2)-C(20)-C(21)-C(22)  | 0.0       |
| C(20)-C(21)-C(22)-C(23) | 0.0       |
| C(21)-C(22)-C(23)-C(24) | 0.0       |
| C(22)-C(23)-C(24)-N(2)  | 0.0       |
| C(22)-C(23)-C(24)-C(25) | 173.5(8)  |



|                             |           |
|-----------------------------|-----------|
| C(20)-N(2)-C(24)-C(23)      | 0.0       |
| Pd(1)-N(2)-C(24)-C(23)      | -177.7(6) |
| C(20)-N(2)-C(24)-C(25)      | -173.9(7) |
| Pd(1)-N(2)-C(24)-C(25)      | 8.5(7)    |
| C(23)-C(24)-C(25)-O(5)      | 119.3(7)  |
| N(2)-C(24)-C(25)-O(5)       | -67.0(8)  |
| C(24)-C(25)-O(5)-C(2)       | -179.0(6) |
| O(5')-C(2)-O(5)-C(25)       | -11.0(8)  |
| C(1)-C(2)-O(5)-C(25)        | 104.4(6)  |
| C(3)-C(2)-O(5)-C(25)        | -140.5(6) |
| C(24')-N(2')-C(20')-C(21')  | 0.0       |
| Pd(1)-N(2')-C(20')-C(21')   | -173.9(5) |
| N(2')-C(20')-C(21')-C(22')  | 0.0       |
| C(20')-C(21')-C(22')-C(23') | 0.0       |
| C(21')-C(22')-C(23')-C(24') | 0.0       |
| C(22')-C(23')-C(24')-N(2')  | 0.0       |
| C(22')-C(23')-C(24')-C(25') | 177.3(8)  |
| C(20')-N(2')-C(24')-C(23')  | 0.0       |
| Pd(1)-N(2')-C(24')-C(23')   | 173.7(6)  |
| C(20')-N(2')-C(24')-C(25')  | -177.5(7) |
| Pd(1)-N(2')-C(24')-C(25')   | -3.8(7)   |
| C(23')-C(24')-C(25')-O(5')  | -103.1(8) |
| N(2')-C(24')-C(25')-O(5')   | 74.3(8)   |
| C(24')-C(25')-O(5')-C(2)    | 177.3(6)  |
| O(5)-C(2)-O(5')-C(25')      | 15.4(9)   |
| C(1)-C(2)-O(5')-C(25')      | -59.8(9)  |
| C(3)-C(2)-O(5')-C(25')      | 74.2(8)   |
| C(1)-S(1)-C(26)-C(27)       | -177.3(4) |

---

**Table 7.** Hydrogen bonds for avd13811 [ $\text{\AA}$  and  $^\circ$ ].

| D-H...A               | d(D-H) | d(H...A) | d(D...A)  | $\angle(\text{DHA})$ |
|-----------------------|--------|----------|-----------|----------------------|
| C(2)-H(2)...Br(2)#1   | 1.00   | 2.97     | 3.950(5)  | 165.6                |
| C(6)-H(6B)...Br(1)#2  | 0.99   | 2.96     | 3.820(6)  | 146.5                |
| C(14)-H(14A)...Br(2)  | 0.99   | 2.99     | 3.711(5)  | 131.0                |
| C(14)-H(14B)...O(3)   | 0.99   | 2.56     | 3.180(6)  | 120.7                |
| C(16)-H(16)...S(1)#3  | 0.95   | 2.96     | 3.604(4)  | 126.1                |
| C(18)-H(18)...O(2)#4  | 0.95   | 2.63     | 3.452(5)  | 144.8                |
| C(25)-H(25A)...Br(1)  | 0.99   | 2.71     | 3.502(9)  | 137.6                |
| C(25)-H(25B)...S(1)   | 0.99   | 2.55     | 3.267(9)  | 129.3                |
| C(25')-H(25C)...S(1)  | 0.99   | 2.88     | 3.437(10) | 116.5                |
| C(25')-H(25D)...Br(2) | 0.99   | 2.88     | 3.673(10) | 137.8                |
| C(27)-H(27A)...O(3)#5 | 0.98   | 2.44     | 3.411(6)  | 171.9                |

Symmetry transformations used to generate equivalent atoms:

#1  $x+1, y, z$  #2  $-x+2, y-1/2, -z+2$  #3  $x-1, y, z-1$

#4  $-x+1, y+1/2, -z+1$  #5  $x+1, y, z+1$

Projection view with 50% probability ellipsoids- disorder atoms omitted for clarity:

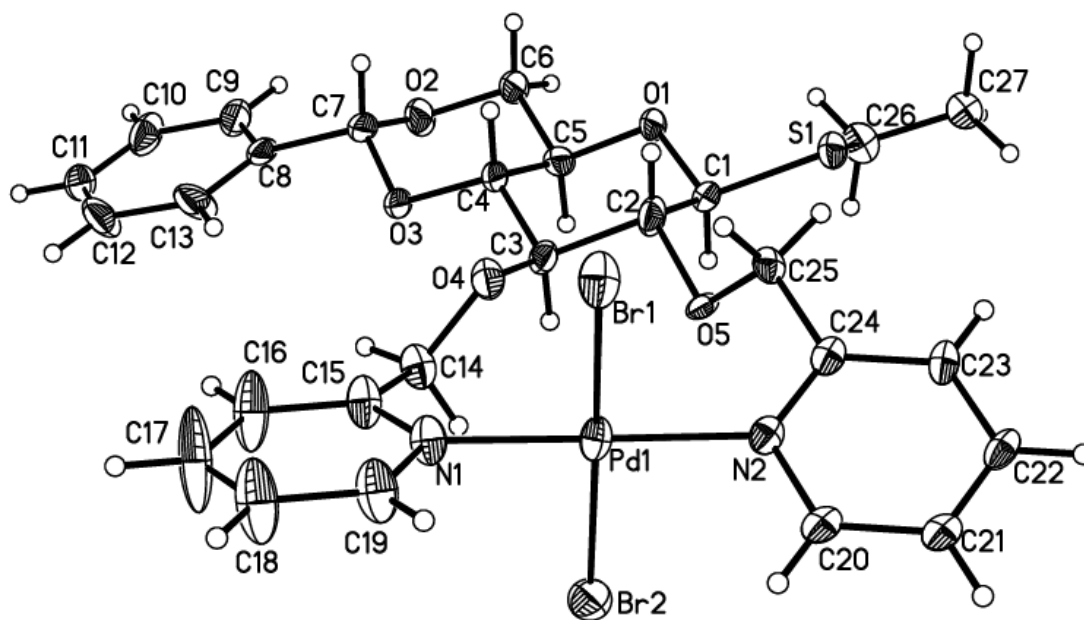

Projection view with 50% probability ellipsoids

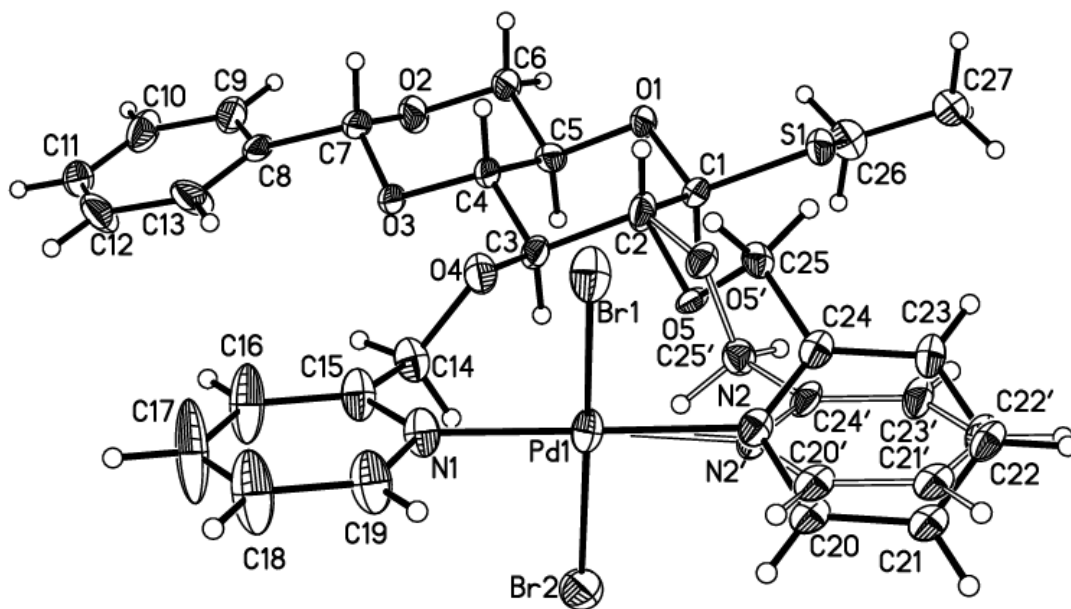

Supplement: c6ob00107f1.pdf [file c6ob00107f1.pdf]
